# Supplementary material for: Transcriptomic Analysis of Glioma Based on IDH Status Identifies ACAA2 as a Prognostic Factor in Lower Grade Glioma
Source: Biomed Res Int. 2020 Mar 21;2020:1086792. doi: 10.1155/2020/1086792 (PMC7115055; doi:10.1155/2020/1086792)
Supplement: Supplementary 2 — Table S1: 220 metabolic genes with significant differences in the IDH wild-type and mutant groups. [file 1086792.f2.xlsx]

## Sheet: Sheet1
symbol	TCGA-CS-4941-01A	TCGA-CS-5395-01A	TCGA-CS-5397-01A	TCGA-CS-6186-01A	TCGA-CS-6188-01A	TCGA-CS-6669-01A	TCGA-DB-A64O-01A	TCGA-DB-A75P-01A	TCGA-DH-5140-01A	TCGA-DU-5847-01A	TCGA-DU-5852-01A	TCGA-DU-5854-01A	TCGA-DU-6392-01A	TCGA-DU-6399-01A	TCGA-DU-6402-01A	TCGA-DU-6403-01A	TCGA-DU-6404-01A	TCGA-DU-6405-01A	TCGA-DU-6406-01A	TCGA-DU-7006-01A	TCGA-DU-7012-01A	TCGA-DU-7013-01A	TCGA-DU-7290-01A	TCGA-DU-7292-01A	TCGA-DU-8158-01A	TCGA-DU-8161-01A	TCGA-DU-8162-01A	TCGA-DU-8165-01A	TCGA-DU-A5TT-01A	TCGA-DU-A5TY-01A	TCGA-DU-A76K-01A	TCGA-DU-A76L-01A	TCGA-DU-A7TB-01A	TCGA-DU-A7TD-01A	TCGA-DU-A7TJ-01A	TCGA-E1-A7YD-01A	TCGA-E1-A7YJ-01A	TCGA-E1-A7YL-01A	TCGA-E1-A7YM-01A	TCGA-E1-A7YN-01A	TCGA-E1-A7YQ-01A	TCGA-E1-A7Z2-01A	TCGA-FG-5963-01A	TCGA-FG-6688-01A	TCGA-FG-6692-01A	TCGA-FG-7643-01A	TCGA-FG-8181-01A	TCGA-FG-A4MU-01B	TCGA-FG-A4MW-01A
DCTD	4.75909	4.92792	4.32287	4.24229	4.95374	3.8587	4.30666	4.12869	4.49085	4.87125	4.56616	4.28197	4.23996	3.69067	4.72993	3.88767	4.26864	3.65429	4.51287	4.79513	4.72384	4.20345	4.53685	4.2751	4.44839	4.51004	3.92768	4.71387	4.57992	4.70509	4.5145	4.55142	3.76925	4.54542	4.70215	4.21616	4.6452	4.35061	4.20342	4.13404	4.68771	4.48158	3.90442	4.37359	4.78621	4.22337	3.92651	4.27818	4.36171
PPCS	3.78694	3.55793	3.69104	3.57498	3.67184	3.29477	3.87744	3.01117	2.97853	3.91163	3.57207	3.4963	2.59701	1.71747	3.36834	2.97904	3.1938	3.4565	3.17569	3.82644	3.81032	2.94836	4.20902	3.0067	3.6038	3.68909	3.37663	3.93688	3.46245	4.06094	3.44642	3.68686	3.83571	3.45553	3.20874	3.29151	3.58419	3.57476	3.46316	4.04605	3.75885	3.25221	3.48457	3.525	3.63693	3.15482	3.13536	3.32777	3.43078
CBR1	5.99187	4.87376	5.48233	5.65582	5.63694	5.1041	6.29774	5.94559	4.73131	5.75861	5.82727	5.9859	5.47819	2.41462	5.48596	5.87702	5.90968	5.7394	5.09083	6.20678	5.45337	5.51803	5.9196	5.79097	7.75044	5.78484	5.65729	5.15902	6.56293	5.5131	5.95037	5.52002	5.9616	5.30693	5.79744	5.8462	5.40121	5.88389	6.53508	5.96786	5.2216	5.51793	6.30153	6.29829	5.67778	5.88374	4.49398	5.04441	6.53757
MAOB	7.3879	5.52647	7.1076	3.22615	8.72034	4.99564	6.84852	6.87884	5.05663	7.74443	5.70524	7.02172	5.50963	3.23555	6.01716	5.3946	6.27723	8.17801	5.87397	7.00528	7.96685	6.61686	8.67375	6.73644	8.40381	6.64991	5.88129	8.26542	7.71035	5.95843	6.18323	5.58446	4.39009	6.23015	7.26752	5.2993	5.93626	7.22915	4.99677	8.13594	7.16182	4.64273	6.6931	8.67999	7.36061	5.53706	5.30606	6.41809	6.67294
NDST4	0.0468953	0.0327395	0.0664674	0	0.00663652	0.299495	0	0.0210061	0.596495	0.0284206	0.00627638	0.0581244	0.0603497	1.22922	0.00567168	0.0194635	0	0.00587115	0	0	0.128129	0.0044963	0.0123601	0.214579	0.00917848	0.0882929	0.229783	0.230133	0.0956372	0.0315011	0.021629	0.00714146	0.0173492	0.00818104	0.00622479	0.567105	0	0.0391982	0.0168215	0.0367413	0	0.0135158	0.0297255	0.0427455	0	0.148228	0.157052	0	0.0240696
CYP27A1	4.89664	4.07789	4.22736	4.86197	4.6701	3.19184	5.01151	5.20414	4.01869	4.70331	4.35624	5.41766	3.31882	3.87555	4.74612	4.63933	4.54473	4.64336	4.04267	4.48661	5.08684	3.65679	5.03139	3.98229	4.98742	4.5431	4.24691	4.46067	4.14045	5.47097	4.66309	4.44378	4.53808	3.68815	4.13163	4.05268	4.56892	4.32444	5.17274	5.49033	3.30915	4.8344	5.84751	5.30237	4.43334	4.67775	2.96544	4.17338	4.75254
GLUD1	6.44694	7.17552	6.25089	6.51278	5.98586	7.07173	6.27856	6.56458	6.02087	6.11294	6.42864	6.16632	5.67931	7.90326	5.18279	5.67462	7.14721	6.35678	5.59042	5.62636	6.41991	5.57398	5.84162	6.40334	5.61594	5.92407	6.77543	5.79323	6.32767	5.95991	6.88202	5.26275	6.53183	5.21786	5.92741	6.18934	5.87943	5.26772	6.48826	5.81534	5.14885	7.08996	6.27149	5.99456	5.10383	6.82023	6.57671	5.42693	5.95323
ACAA2	3.72486	4.45282	3.97003	4.31784	3.44834	3.05231	4.30752	3.44261	1.59091	3.81252	2.69302	3.02756	3.49124	2.12032	2.89491	3.58356	3.17741	3.36402	2.83431	3.49061	3.08443	3.04455	4.18672	2.62884	3.41433	4.08149	2.92281	4.2056	3.26786	4.27164	3.79129	3.51683	3.6832	3.49123	3.04069	3.64296	2.05748	3.17058	3.37781	4.09832	3.04488	3.59996	4.01606	3.70097	3.64657	3.39688	2.73475	2.89145	3.02547
FUCA2	4.33768	4.13462	3.72211	3.42189	4.79946	2.63897	3.346	4.02375	3.63414	4.03299	4.31698	4.35242	3.41354	2.15041	5.2641	3.89683	4.32373	3.78527	4.81908	4.18171	4.11919	4.40089	4.46508	3.83547	3.92848	3.41536	3.46408	4.39977	4.22043	4.6268	3.96552	4.2806	3.83695	4.23863	4.83193	4.16252	4.6875	4.69532	4.22807	5.09356	3.92772	2.95052	4.20574	4.09712	4.85937	3.6341	2.6515	4.3555	4.51217
IMPDH2	5.27375	5.0027	5.08684	4.82661	5.31432	4.03903	4.92547	4.82852	5.44257	5.60639	5.08234	5.08521	6.05495	6.14919	5.23831	4.69259	6.10702	5.35872	5.32938	5.15273	5.11535	5.42365	5.07406	4.80246	5.18716	4.4546	4.39972	5.21046	4.58076	5.29193	4.78654	5.14951	5.29894	5.24029	5.37185	4.93982	4.46446	5.40795	5.09277	5.20215	4.93285	5.08818	4.84785	5.29085	5.76651	4.41091	4.1183	5.3122	5.14235
GALNT13	1.26402	1.84909	2.37317	1.71882	3.75686	1.89731	1.37855	3.29661	4.24868	2.36679	1.60372	2.12901	2.35098	5.58015	2.796	3.47752	3.92448	1.19154	0.480905	3.87503	3.0913	1.56835	3.55526	2.01627	5.00967	2.98939	2.64267	2.90466	1.24932	0.780495	1.14017	1.62181	3.18975	0.376761	1.21996	1.71044	1.52031	2.72491	2.5542	1.16559	0.82697	2.42066	2.49462	2.01033	0.428244	3.34966	2.38365	0.111835	2.1891
CHST6	2.17521	3.28761	3.70641	1.55452	3.35339	1.05852	4.09856	2.73395	1.26596	3.18511	2.71831	3.43816	2.79825	0.725514	3.27448	2.95194	3.04012	4.10018	2.44846	3.05708	2.87251	1.85085	4.45659	2.7801	3.89899	3.62489	2.6099	2.97579	2.98085	2.06336	3.46174	1.95149	3.9868	2.8234	2.99845	2.64532	1.87742	2.61166	3.27624	2.94856	2.31077	2.25011	3.52382	3.5727	1.98127	2.50647	0.991819	1.60883	3.26517
ACADS	2.87914	2.75646	2.64093	3.22877	3.24138	2.21577	3.4853	3.39178	2.4905	3.3769	2.80627	3.27407	3.08143	2.02914	2.82598	2.91272	2.45385	3.20632	2.59017	2.69924	2.61247	2.29458	2.42936	2.40034	3.44927	3.21814	2.43411	2.51521	3.60037	2.76174	3.62826	2.87621	4.05638	2.76011	2.47054	2.73903	3.49958	3.73835	3.30664	3.54906	2.7493	3.58876	3.63123	3.18636	2.78268	2.30951	2.23916	3.07575	3.25602
HS2ST1	4.07797	4.07031	3.96067	3.32877	4.06675	3.10452	3.99949	2.91072	3.5628	4.42404	3.82631	3.37671	3.87642	3.2008	4.58154	3.22807	3.8785	4.02466	3.91609	4.17907	4.46731	4.14132	3.88296	3.55935	3.9739	4.437	3.45972	4.00202	3.70869	4.18483	3.38494	3.90865	2.75652	3.6639	4.11014	3.91148	3.33919	3.4935	2.81586	2.78818	4.07798	3.55636	3.01108	3.00198	3.53597	3.41623	3.07652	3.87619	2.99139
LDHA	5.07529	4.74302	5.22722	4.59967	5.58641	5.66294	4.55466	4.47651	4.67505	5.87815	5.30996	4.82029	5.75925	4.11017	6.67149	5.09356	5.73162	5.24693	5.53313	5.70673	4.81458	4.75693	5.16798	5.36802	5.0349	5.01789	5.28374	5.15283	4.16934	5.20681	4.64354	6.65262	4.31386	5.34598	5.49306	4.88325	5.33636	6.8803	4.84621	5.06232	6.16411	4.47269	4.67922	4.86051	6.30607	5.04483	5.52684	6.6574	4.93812
NMNAT3	3.08205	2.76299	1.7993	1.97027	1.96228	1.71786	2.57528	1.93308	2.61162	3.61086	2.43989	2.44889	2.34426	0.301419	2.48691	2.25298	0.239362	2.30635	2.21897	1.98006	2.7073	3.16549	2.18481	1.37947	2.39625	3.37208	1.52722	3.0169	2.34947	2.47241	1.76078	2.39418	1.26527	2.39317	2.60388	2.56802	2.13271	2.60184	1.79268	1.80234	2.10633	1.54203	1.43325	2.20222	1.68147	2.27209	1.06132	1.72297	1.93329
PNPLA4	1.12621	3.91509	3.53713	3.36594	2.56034	2.74277	3.86438	2.72267	1.42825	2.9164	2.52116	2.34284	1.33108	0.76864	2.79648	2.68845	1.6281	3.01008	2.27971	2.99487	3.56784	2.57104	2.99034	2.12177	3.16076	3.24765	2.61475	3.9271	2.7753	2.18931	1.64638	1.49475	2.89144	2.7476	2.50658	2.98677	2.30978	2.5684	2.75725	2.9047	3.01389	2.9456	2.50702	3.39929	2.84549	2.78596	2.46658	2.36033	2.11655
PDE8B	2.39265	2.12135	2.62199	2.07635	2.53	3.481	2.77956	2.63107	2.49682	2.2858	2.37743	2.57447	1.86568	2.92947	2.93896	2.68734	1.57385	3.19249	2.77104	2.44577	2.65898	2.44897	2.67304	3.32424	4.16267	2.17481	3.52123	2.18383	2.3914	2.5594	2.57067	2.29869	2.32876	2.22343	2.14117	2.68993	2.75951	2.84066	2.81287	3.6031	3.7026	3.49521	1.8649	2.66296	2.64471	3.05036	3.69295	4.20017	2.44416
PLA2G5	3.66749	2.25855	3.54549	3.6427	3.37381	1.44779	4.63543	4.75564	1.08937	4.45658	3.67511	4.32205	1.0329	0.283466	6.09432	1.58291	0.47124	3.81886	2.85217	4.75631	2.56967	1.46874	2.43468	3.56576	3.93277	4.57764	2.58785	2.38788	4.26251	3.12615	3.01793	2.07757	0.505849	3.68486	3.99177	3.66148	2.38178	2.13706	3.02573	3.11331	1.76787	2.17138	1.34388	3.74328	4.21251	2.8115	1.55444	1.57096	2.275
OPLAH	2.29102	1.92547	1.78381	3.22462	2.64261	1.37256	3.14956	3.37037	0.842882	2.00296	2.82719	3.12126	0.840649	0.67209	2.42821	1.68977	3.75548	2.77831	2.17354	1.69957	2.30337	0.855221	2.62646	1.4619	2.0727	3.08629	2.19705	1.57491	3.03242	1.51744	2.95428	1.85061	2.24696	1.39272	1.59539	1.78593	3.32729	2.79923	3.97212	3.70959	1.90913	4.0122	2.39189	2.39344	1.8585	1.61043	1.46251	2.57027	2.8113
SMS	4.47876	4.44383	4.53874	4.27629	5.59979	4.96262	4.51738	5.02043	5.17879	5.11027	5.03688	5.32058	5.11374	4.40892	5.5553	4.89854	5.20318	5.16401	5.10071	5.64059	4.70091	5.07941	4.61095	4.74667	4.6696	4.21004	4.50776	5.87102	4.58562	5.13818	4.51838	5.90844	3.31772	5.21069	5.49088	5.71651	5.17072	5.24811	5.33109	5.28477	4.60204	5.33298	5.15394	4.35948	5.09821	4.51445	4.84025	5.48029	4.95799
MTHFD2	2.82001	2.49426	2.70965	1.54956	3.59461	0.868583	2.69305	1.02444	2.88513	3.5776	2.97796	2.50711	3.39919	4.92179	2.62477	2.85681	2.13164	1.6332	2.5171	2.83444	2.7728	3.86852	4.11777	2.06799	2.85133	4.02635	1.60073	2.48242	3.55503	2.79979	2.79385	3.51556	1.77424	2.78151	2.67633	3.60966	4.43358	3.85306	3.31624	4.08952	5.05769	3.49092	3.15245	3.74391	3.54513	2.59166	1.80581	3.93435	4.23514
AKR1C3	1.73699	1.56204	1.54315	0.670566	0.888125	1.49214	2.62773	1.53009	1.74467	2.18819	1.01299	1.7197	1.08339	3.00995	0.443822	0.946979	1.01929	0.625455	0.525428	1.20328	1.55027	1.05523	1.93378	1.45273	3.68366	1.83116	1.33221	2.56543	4.20726	0.930307	1.82773	1.12099	0.813355	0.395861	0.534423	0.241891	1.58453	0.876399	1.68345	1.70895	1.82407	1.58774	1.94438	2.82988	0.403876	1.65578	1.67291	0.274269	1.31635
ACSS3	1.80436	2.00472	1.96937	1.83084	2.46694	0.927867	1.9863	2.02561	0.562897	2.23907	3.17847	2.75832	0.360876	0.463935	3.8251	1.33544	0.266544	2.23362	3.39109	3.54033	1.7622	2.42198	1.92483	1.76574	1.74174	2.07085	1.87536	1.42769	1.68014	1.75436	1.76222	1.20698	0.496817	2.56347	3.28216	2.69504	2.6089	2.6028	2.02655	1.88683	2.24979	1.59601	0.993285	1.81298	3.31297	2.21573	1.11453	3.38349	2.37549
B3GNT5	1.90149	2.41099	2.17979	1.05487	2.34672	0.254894	1.53756	0.895269	1.43361	2.42549	1.58685	1.64558	1.40379	0.572161	2.55334	1.45398	2.24368	2.30953	2.18107	2.10704	2.23463	1.78544	3.657	1.22777	2.20976	1.81576	1.35887	2.94932	2.14181	2.00471	1.26152	1.61502	0.305487	2.56962	2.21135	1.58168	1.55388	3.24286	1.08399	1.55513	1.7943	1.22359	1.01408	1.838	1.57124	0.902239	0.724876	1.8855	1.45064
NEU4	1.76039	1.96549	1.57462	2.23137	2.54639	0.707373	2.73625	2.31905	1.43252	0.800438	3.75385	2.05632	2.73697	3.44737	0.19766	2.99132	0.579711	2.90955	2.77385	1.2946	1.61926	1.36155	1.05061	1.81389	3.12969	2.41209	1.44177	0.30394	3.90645	1.47131	1.84548	1.70101	0.885651	3.00732	2.96107	3.71239	1.89326	2.34625	2.52438	2.00265	1.42672	2.95465	3.89236	2.46684	1.48606	1.4866	1.11186	2.10713	4.53253
B3GNT7	1.66682	0.475342	2.00562	0.334447	2.01955	1.32362	1.64341	3.11718	2.90541	1.1282	2.25795	2.4604	4.87955	0.568842	1.35983	3.19082	0.521257	1.85357	3.2239	2.76939	1.20295	1.21266	1.23487	1.59906	3.86467	2.02594	1.85009	1.21024	0.992119	1.44087	0.672724	1.89728	5.16881	1.55548	2.23305	1.28997	2.12601	1.34399	1.82775	2.19107	2.00259	0.840741	2.90714	2.17695	1.8341	2.15729	1.08075	2.45818	3.04864
UPP1	1.99029	2.32689	3.2014	3.0971	2.84504	1.67577	2.90737	2.28485	1.78229	2.92576	2.11557	2.37172	1.39106	1.13225	4.41722	1.62567	3.22714	3.14127	2.04571	3.88004	2.4863	2.21637	2.25453	2.08139	2.17174	3.44907	1.5175	2.44663	2.70527	3.68641	3.54381	3.23928	1.70239	2.64366	3.63158	2.25912	3.42528	4.23002	2.50685	3.71479	4.55395	2.20353	2.77383	2.85974	2.71061	1.69087	2.15159	2.48136	2.86014
GALM	3.10568	2.38634	2.71479	2.75568	2.74225	1.27259	2.43158	2.85661	1.80318	3.30665	2.40142	2.91097	1.36214	1.7706	3.03631	2.45841	2.50424	2.70426	2.85557	3.04796	3.37226	2.30945	2.77232	1.91199	2.96929	2.57255	1.76461	3.39487	2.39856	3.60053	2.46341	2.40407	0.84876	2.61455	2.39807	2.68381	2.88946	3.16951	1.91045	4.18383	2.92332	2.07663	3.01466	2.4582	3.37627	2.03991	1.55863	2.95087	2.15858
BCAT1	2.99328	2.07084	2.31422	0.373117	4.7008	2.16088	1.39194	3.21405	3.13604	1.24248	3.75585	3.45899	4.62473	0.917842	4.86938	3.5613	1.85413	3.03669	5.35013	5.22065	2.10628	4.2347	2.03587	2.73855	1.77142	2.07033	3.29948	1.2887	1.23496	2.34891	1.28945	5.18129	2.13608	4.06965	4.76804	2.78525	3.98662	3.21119	1.60367	1.93158	1.37985	1.02471	3.19489	1.53787	3.60208	2.66194	1.97644	4.21628	2.36975
FAH	1.5695	2.36937	1.93402	1.66861	1.9183	1.16846	2.45395	2.66718	1.06446	2.21909	1.52846	1.92497	1.39033	1.22107	2.46669	1.62571	2.43784	1.9788	1.09882	2.74884	2.60145	1.38081	2.00053	1.55483	1.66644	2.24651	1.6072	1.8467	2.11662	2.34396	2.22052	1.85837	1.97542	1.80994	1.36232	1.87515	1.8223	2.37808	1.94252	2.86426	2.25604	2.20493	2.25622	2.15442	1.96086	1.50406	1.28375	1.80714	1.66262
PYGL	3.23657	3.28429	3.76432	3.05611	4.2626	1.31844	3.19177	2.85247	3.11885	4.30549	3.07808	3.75473	3.18082	2.23356	5.04763	2.93681	3.71902	4.08881	3.70391	5.31654	3.46806	3.30161	3.61836	3.40785	3.71426	3.56312	1.69361	3.86273	3.25719	3.67783	2.88837	4.05887	2.1378	3.57405	4.02592	3.25405	4.20695	3.74033	2.84339	4.23221	3.88586	1.82925	4.85668	3.34207	3.78139	1.96231	1.42592	4.71507	3.35233
PIPOX	5.43368	4.21871	3.65008	5.37417	3.56508	1.65696	5.01911	5.17216	0.906499	4.83194	4.55938	5.33869	1.67439	1.71947	4.70585	2.28156	3.61316	4.35173	4.48249	3.87586	3.84993	4.01545	4.22879	4.03933	2.82289	4.93656	3.16844	3.7519	4.40409	3.50983	4.25045	2.8967	0.898876	4.26929	4.17628	4.17977	4.84519	3.16582	3.89615	4.07284	3.24035	2.18549	2.57513	4.30593	5.3257	4.98433	1.92618	3.66025	4.26048
CHST2	3.36767	3.49758	4.08657	2.45789	4.58159	3.08782	3.65152	4.79127	3.19729	4.79259	3.86048	3.75945	3.05888	2.99754	5.85604	2.45018	4.69456	4.51442	3.92814	4.62695	2.96908	2.91536	3.95726	3.24867	3.83404	3.38494	2.7809	3.12663	3.37273	2.76093	2.87788	4.35912	4.04512	2.57017	4.40154	2.16663	3.12278	3.50467	3.00195	3.7659	2.64504	3.59699	3.86977	4.18869	4.06407	2.80372	3.15006	4.35291	3.89468
POLR2L	5.41866	5.5361	5.63887	5.6635	5.59387	5.1824	5.73179	6.1653	5.08532	5.73566	5.98872	5.29774	5.79979	4.92376	6.46192	5.22167	5.97721	5.75772	5.824	5.45395	5.39781	5.20887	5.75114	5.60214	5.26231	5.91526	5.17169	5.30767	6.11331	5.66831	5.99112	5.81217	5.69957	5.83623	5.90963	6.37299	5.95194	5.98021	5.95629	5.35478	5.7183	5.73795	5.80933	5.79893	6.56225	4.97394	4.94503	5.62108	5.87642
ACACB	1.77515	1.72907	1.67765	2.29242	1.39452	1.49012	2.18668	1.89095	0.692881	1.93504	1.35329	1.90146	0.589515	0.76849	1.16299	1.27413	1.67429	1.64991	1.28023	1.49431	1.66969	1.22289	1.95237	1.74962	2.1802	2.15765	1.8182	2.29044	2.07395	1.22911	2.31343	0.795269	2.10378	1.16683	1.55316	1.85099	1.84775	1.37496	2.76724	2.894	2.73078	2.88377	1.72129	2.12416	1.48254	1.77359	1.78267	1.03894	2.08314
GNMT	0.872633	0.433347	0.618545	1.17446	0.549786	0.765828	0.687841	0.912236	1.26717	1.25955	0.920223	0.891999	0.799915	1.8405	0.590358	1.28985	1.16099	0.783663	1.26935	0.822123	0.491863	0.712739	0.715252	0.586947	0.725242	0.984643	0.726577	0.976515	0.964275	1.01058	1.4962	1.14083	0.753201	1.40991	1.03567	1.25831	2.11654	1.63326	1.71303	1.14278	1.06457	1.33251	1.05889	1.21813	0.585407	0.808006	0.334423	1.02498	1.56327
HPSE2	1.27141	2.93395	0.743529	3.85506	0.0973602	1.07024	2.37242	0.505371	0.416028	0.243785	1.01145	1.01038	0.205048	2.74894	0.0470298	1.23858	0.0634473	0.0390581	0.0845501	0.0365895	0.373541	0.443327	0.0309912	0.826367	0.225423	1.89049	1.52507	0.0854364	2.4245	0.46538	3.36162	0.0762405	0.767419	0.0475195	0.0666561	0.176585	0.163652	0.182887	1.31026	0.982895	0.184564	1.57122	1.60499	1.31342	0.0731454	2.85644	2.01436	0.0376151	1.13479
AK4	5.18154	5.32993	3.36278	5.47238	3.41868	3.54754	4.20694	3.1648	1.82581	4.20247	3.65845	3.32009	2.7715	2.32975	4.32254	2.25887	4.75351	3.38266	3.5983	2.89384	3.94609	2.58241	3.72052	4.1339	3.47144	5.46192	3.85487	4.29246	4.42936	3.46148	4.40109	4.10881	2.17216	2.62757	2.34383	3.99323	2.92475	4.75331	4.05718	3.28218	4.36428	2.14499	2.7588	3.66522	4.06532	4.46028	3.34401	4.44945	3.39954
MGST2	2.81328	1.97825	2.40689	2.56344	2.75716	1.44903	2.76809	2.64808	2.16369	2.9355	3.12517	2.91253	2.29112	2.09292	3.4307	2.2943	2.35457	2.42377	2.55298	3.2818	2.73013	2.63113	2.91294	2.07978	2.66215	2.63485	2.03634	2.90954	2.68726	3.54773	2.56909	2.67012	1.58194	2.54727	2.53632	3.03374	2.93844	2.8824	2.63431	3.20636	3.03857	2.24666	2.78208	2.68431	2.90937	2.38732	2.00875	2.56361	2.03107
GGH	2.85928	2.97783	3.42118	3.33438	2.94486	2.10082	3.18386	1.80166	2.92966	4.10173	3.0815	2.63973	3.04658	2.37417	2.5119	3.29527	2.43035	3.13843	3.63503	2.76466	2.84971	3.83794	3.22455	2.73965	3.10599	3.39372	2.57689	4.40085	2.94184	3.66058	3.19419	3.28888	1.89964	3.17967	3.38306	3.68086	2.77891	3.93967	3.25852	1.62842	2.4419	3.63638	2.94733	2.55076	3.06782	2.50412	2.30809	3.59546	3.38199
CA2	5.74367	5.9177	5.83021	6.5396	6.70731	4.98483	7.02058	4.69754	3.13986	6.81472	6.57419	6.74817	4.92348	3.65254	6.92825	5.59066	5.87202	6.51931	5.78696	6.30283	5.59507	5.32443	5.76379	4.64198	6.36591	6.94292	5.37336	4.5514	6.04236	6.37488	5.38664	6.44882	4.12598	5.0872	5.08726	5.96345	5.69714	4.21118	6.50006	6.15051	6.66058	5.42447	6.4027	5.62592	6.37428	6.51428	4.43475	5.73593	5.86011
CHST15	2.72062	2.85727	3.29776	2.32206	3.41793	3.58689	2.07066	2.59206	2.55213	2.32868	2.59503	2.69877	2.24583	3.48424	2.76938	2.77281	4.07079	2.86486	2.13811	2.72028	3.67736	3.29948	2.86562	3.10907	2.79028	2.07757	3.20949	2.14575	3.20069	2.57995	2.71382	3.24294	3.22039	2.84842	2.47923	3.21798	2.51806	3.43112	2.34752	2.64996	2.89339	2.43394	3.02456	2.76333	1.81799	2.79333	3.39786	2.52472	2.17106
CYB5R1	4.47564	2.28394	3.87814	3.71775	4.76919	3.43864	4.64934	3.80805	3.30036	3.88647	3.55057	3.88357	3.66697	2.69068	3.93803	3.16575	2.72862	3.9958	3.38218	4.4571	4.81631	2.82954	5.59147	3.29764	4.36136	4.25002	3.66717	4.57998	5.07063	3.82285	3.8105	3.78021	3.75136	3.38575	3.44587	3.6082	3.98885	4.23611	3.38096	4.1077	4.61229	3.541	3.74607	6.8884	3.6036	3.49462	3.32659	3.29638	3.6537
GATM	6.035	6.93357	4.93092	6.93757	6.686	3.82393	6.28304	5.34375	5.66786	5.78299	5.9221	5.50692	4.1302	4.00115	5.31851	4.19249	5.16	4.87191	6.13747	5.78656	6.0704	6.22106	5.70561	5.8452	4.05399	5.37609	4.87124	4.69389	5.38018	5.75713	6.39394	4.43718	5.2642	6.36	7.05363	4.83987	5.0772	6.24336	5.05242	4.46985	6.05593	4.28176	4.09707	5.17053	4.69504	5.16215	4.86429	6.18912	4.90689
HS3ST3B1	1.50159	0.928574	0.519685	3.45067	1.47486	0.0472679	0.675772	2.76908	0.102726	0.982618	2.07744	2.39259	0.148658	0.140822	3.27091	2.41822	2.69075	2.35212	1.75507	2.82385	0.330476	0.643741	1.37567	0.403299	2.33848	2.21095	0.332003	0.282717	0.830369	1.98686	0.947803	0.566966	1.01233	0.882279	3.30989	1.36127	2.04763	1.596	1.27873	0.704917	2.37388	0.126063	0.176105	0.462643	3.5072	1.98088	0.409217	3.02066	1.68219
DPYD	2.35662	0.93671	2.12101	1.40066	3.65515	0.918832	1.68482	0.960037	2.27073	3.25596	2.10325	2.95271	1.70773	1.0758	4.34237	1.84915	0.836447	3.09451	2.25293	4.42169	3.64551	2.75322	4.29912	1.41355	3.19593	2.85984	1.32568	4.53505	1.91777	2.87186	1.42956	2.70415	1.26242	2.74028	4.04238	1.32516	1.87158	3.33462	1.66124	2.47114	2.68194	1.09824	1.98406	2.83789	2.87115	1.37979	1.03698	2.26948	1.80759
UST	3.56625	3.46298	2.69005	3.53422	3.96584	2.97084	3.67112	3.49217	3.90807	2.84813	3.90833	3.11221	3.3207	5.5866	2.6152	3.73963	3.74356	3.03251	2.46273	2.74664	5.03574	3.74306	3.76833	3.29819	5.1148	2.89918	2.23608	3.61031	4.2932	4.21693	2.78146	2.91919	3.01255	3.35969	3.63155	3.92637	2.97697	4.20406	3.41983	2.97431	3.11322	2.71494	2.76036	2.39444	2.70025	2.6464	2.24445	2.75307	3.76567
LCAT	2.8032	2.31245	2.75247	2.70906	3.71699	1.05376	4.34061	3.22548	3.01336	3.15163	2.96135	3.4652	2.44582	3.46527	2.49792	2.69838	2.3799	3.77231	3.17482	3.15651	3.21652	2.14355	3.53293	2.72662	4.19964	2.67845	1.99721	3.42459	4.7771	3.00664	4.23591	2.77597	2.6066	3.17128	3.2833	5.3681	4.42932	3.89831	3.70834	2.26321	3.10882	3.15938	4.18687	3.92828	3.28761	2.41037	2.59868	3.65158	3.61052
UGCG	2.97194	2.14465	3.73823	2.33983	4.1275	3.09185	3.46728	2.16184	3.17336	3.45535	2.7627	2.96532	2.99476	2.38059	3.66392	2.85067	2.29087	3.09563	3.04831	3.39543	3.54314	3.62375	3.39125	3.18044	3.78055	4.14222	3.09848	3.20095	3.96956	3.71259	2.96541	4.4567	1.58116	3.12993	3.88434	2.85347	3.32862	3.74014	2.55269	3.40148	3.86049	2.42159	3.03272	3.4455	4.44067	3.44765	3.23564	4.45771	4.04524
PLCE1	2.14445	1.5529	2.42973	2.25909	2.56921	0.893985	1.48587	1.82372	2.69786	2.01069	2.83855	2.26781	2.70916	1.67111	2.0408	1.76507	3.49894	2.52334	2.62176	2.2852	2.2966	2.35257	2.6049	1.95322	2.02315	1.85336	2.01056	2.24597	2.77676	1.89085	1.37936	1.78283	2.0572	2.36391	2.6016	2.22073	1.9957	1.64556	1.98065	1.88989	2.29633	1.20245	1.71133	1.86894	2.38451	1.44962	1.19672	2.31211	1.96556
ALDH2	4.31151	4.9463	4.31548	5.09729	3.64246	4.95429	5.58293	4.366	4.27005	4.00031	4.44463	3.93431	3.10826	5.15818	3.32397	4.6453	4.69293	4.03682	3.11906	3.50644	4.18764	3.15638	3.96503	4.11882	5.01029	5.08315	4.56731	3.72909	5.03281	4.53597	5.04359	3.30258	4.11154	3.01788	3.39296	4.27329	3.86479	3.97469	4.92774	4.50477	3.17382	5.40835	4.36897	4.14515	3.68347	4.81775	4.7712	3.21259	4.61726
GALNT2	4.01779	4.21854	4.58794	4.04107	4.82784	3.19476	3.89434	3.63095	3.89593	4.37541	4.57038	4.05572	4.18308	3.74249	5.58944	3.9727	4.96713	4.39147	4.75333	4.96589	4.44646	4.54429	4.75381	3.72594	4.5709	4.5094	3.75128	4.34973	3.9089	4.427	2.91082	4.4084	4.60973	4.0639	4.12367	3.75201	4.1648	4.18427	3.75154	3.8012	4.76294	4.34578	4.1408	3.57551	3.37127	3.3886	3.354	4.49813	3.95161
HEXB	3.88705	2.69865	3.63824	2.92819	4.07853	2.40322	3.46997	3.02643	3.07796	3.99282	3.76809	3.84673	3.40236	2.68068	4.71049	3.39102	3.05747	3.78859	3.68555	5.01561	4.23248	3.91573	3.91785	3.09789	4.02216	3.44435	2.88429	4.17099	3.38695	4.27329	2.98817	4.34082	2.23261	3.84447	3.70322	3.62127	4.10886	4.67667	3.17492	4.95453	4.27386	3.1192	3.72138	3.61104	3.78717	2.86219	2.80862	3.79772	3.19275
GCLM	2.87228	2.41613	2.45631	2.33818	2.83351	2.23784	2.40361	1.75635	1.76807	2.57947	2.06147	1.98963	2.0653	1.84534	2.29998	1.689	2.10124	1.86338	2.14725	2.24246	2.63823	1.84119	4.01814	2.32548	3.2433	2.41357	2.50685	4.34237	2.91673	2.58461	2.32586	3.36967	1.73068	2.69826	2.49123	2.63231	1.98952	2.07908	1.96684	2.94468	2.99688	1.98123	2.01222	2.67082	1.97347	2.27442	2.05116	3.39409	2.12025
IDI1	3.33787	4.25871	4.6306	3.89844	3.80046	4.59781	3.905	5.2011	4.13584	3.88068	3.60878	4.16783	4.36008	4.59149	3.80275	3.95476	4.53657	3.73891	3.43594	3.60797	3.67758	3.35766	3.6816	4.44197	3.69052	3.85786	5.33369	3.35503	4.80079	3.32375	4.25534	3.7637	5.39856	3.76727	3.77544	4.58002	3.36944	3.05833	4.77877	3.55724	3.49377	4.57251	4.40687	4.17391	2.65834	5.1517	5.56707	3.12566	4.39023
POLR2F	0.365024	0.229131	0.346692	0.260723	0.16575	1.26223	0.669046	0.915025	2.30181	0.239665	0.372648	1.06212	1.60131	0.785256	0.098594	1.31037	0.282616	0.389695	0.757436	0.45724	0.165503	0.486029	0.300703	0.824146	0.577353	0.255923	0.910755	0.126093	0.451568	0.243202	0.841361	0.353656	2.18663	0.408557	0.641064	1.00153	0.716519	0.609821	1.34786	0.66827	0.122043	0.757838	1.12775	0.658596	0.268568	1.10254	1.27658	0.268475	1.26799
CYP2D6	0.500745	0.029933	0.250025	0.578744	0.300561	0.631129	0.434286	0.384206	0.671207	0.757473	0.277853	0.437914	0.49205	0.37412	0.209026	0.397302	0.358457	0.45677	0.74814	0.335105	0.182995	0.307535	0.242907	0.237109	0.285233	0.598637	0.476332	0.37545	0.620798	0.596913	0.0962396	0.212431	1.47525	1.21155	0.677176	1.07011	0.661563	0.994437	0.692385	0.50804	1.35003	0.371546	0.656982	0.436326	0.351713	0.196252	0.344086	0.483737	0.534252
SMPD3	1.479	1.24045	1.83564	1.54766	0.770524	2.93457	1.55481	1.83909	3.39123	0.566715	1.69502	0.536476	3.31057	2.29761	0.41933	2.82394	2.22132	1.35002	1.10586	0.43784	0.496464	1.19605	0.421554	2.02619	1.37658	0.867594	2.08349	0.783186	0.654969	1.05045	1.83564	1.18737	1.2403	1.60796	1.08697	1.52024	0.80897	1.56476	1.33088	0.727654	0.440628	1.08646	0.849327	0.894042	0.556396	1.59328	2.68411	0.534226	1.37243
GMPR	5.05601	4.2524	3.23797	4.72998	4.56082	1.7768	4.91637	4.876	1.92539	5.3187	3.87356	3.38059	2.93755	3.44681	3.08889	2.91032	6.49413	4.84101	3.46757	1.9493	5.19322	3.08214	5.98084	3.40063	4.58189	2.96427	2.81723	4.34719	5.23588	3.62396	5.1622	2.69642	2.34445	3.32626	3.8226	5.10126	4.13797	3.34527	4.26325	4.92026	3.747	7.0533	4.00551	5.13639	3.82077	3.54329	2.50591	3.00202	3.62515
MAN1C1	2.69661	3.09508	3.31401	0.546956	4.91134	2.32834	4.84561	2.70207	1.65005	4.86297	2.44429	3.35314	2.61504	2.29028	4.45838	2.69159	2.84354	5.34362	2.63719	4.88594	4.5838	2.24413	4.69831	2.87452	5.84785	4.15604	2.6933	4.57542	2.22243	3.0514	2.92546	3.54663	3.11077	2.53457	4.13878	1.87172	2.40462	4.57626	1.7162	3.47928	2.74331	1.87432	4.17013	4.51324	3.23442	2.45528	3.5601	3.84389	3.21792
GNS	4.50318	4.73292	5.00052	4.19812	5.24216	3.32443	4.23666	3.89132	4.17818	4.60114	4.95112	4.88854	4.74552	4.31218	5.26381	4.54299	4.81396	4.9743	4.90564	6.24839	5.3564	5.18326	4.92488	4.41926	5.09917	4.74832	4.14885	5.32428	4.60739	6.43578	3.94813	5.39739	3.78979	4.72117	4.97158	3.76884	4.76486	5.00978	3.64438	5.18014	4.9081	3.96118	5.04767	4.51204	4.53741	3.80761	3.30178	5.02073	4.44589
GCK	0.657689	1.00761	1.30876	0.350844	1.89875	0.934091	2.1219	1.70026	0.810605	0.768616	0.70433	1.38939	1.99763	0.261045	1.52786	1.2832	0.990535	1.05775	0.908829	0.61384	2.06119	1.55602	1.83887	0.731107	1.89114	0.504555	0.922058	1.68468	3.88325	1.37758	1.1348	1.11971	0.701162	0.996659	1.919	1.85692	0.820005	2.92476	1.96713	0.992097	0.442841	2.25416	1.104	2.08418	1.01092	0.889372	1.06866	1.41769	0.578518
LAP3	5.77855	5.13966	5.09218	5.45468	5.51327	3.26942	5.02608	4.82905	4.38063	6.15477	5.04218	4.97636	5.55672	4.53028	5.45548	4.70812	4.39982	5.38656	6.3356	6.04161	6.16094	4.64772	5.96373	4.87816	5.537	6.24877	4.49526	5.70894	5.52031	4.81953	4.74747	5.92512	3.90376	6.50442	5.60192	4.76034	5.61471	5.03495	4.73583	6.55149	6.47097	4.73056	5.29449	5.02134	5.73208	4.60728	3.84923	5.58979	5.11468
GCLC	3.12139	3.63738	2.59556	3.20412	2.94037	2.69107	3.02174	1.86919	2.85474	2.09829	2.45202	3.08771	2.78479	3.82326	2.92012	3.13703	2.89257	1.49786	2.24589	2.16037	3.43635	2.894	2.42668	2.56583	3.09263	3.21833	2.99102	3.18236	3.41082	2.63893	3.31653	2.83696	2.92624	2.91502	2.57885	3.54801	2.91504	2.90291	4.03672	3.54952	2.41046	4.16394	3.13927	3.419	2.46299	3.48185	2.49017	2.43778	3.01876
PLOD2	3.21416	3.26852	3.23488	2.34789	3.38889	1.78664	3.46715	2.66793	2.35905	3.70401	2.64207	2.93419	2.85572	2.74287	3.87332	2.06954	2.98837	3.15222	2.69882	3.68849	3.6955	2.76646	4.51294	2.78093	3.83878	3.90635	2.44806	4.07163	3.369	3.49203	1.90392	4.32509	2.40909	3.58436	3.49467	3.54935	3.39272	3.90491	2.65065	3.57169	3.79783	2.86102	2.27974	3.37284	3.03017	2.58009	1.68239	4.37409	2.70385
ISYNA1	2.56906	2.08717	2.7667	1.75519	2.97182	2.43536	3.41705	3.42624	3.51804	4.94416	3.32776	3.07703	3.34417	2.48197	2.79253	3.26201	5.23351	3.4838	3.97789	2.57688	2.90213	2.92863	3.47053	2.503	3.83053	2.44239	2.37137	3.20468	2.84985	3.7872	2.78512	4.24706	3.7568	3.25391	3.22708	3.1985	3.57416	3.80482	2.76075	3.16232	4.00838	2.41783	3.39179	2.62564	3.55968	2.23115	3.0362	4.01339	4.01994
GPX7	3.0377	2.53495	2.771	2.87723	3.21641	1.20839	2.71263	2.53493	3.49329	3.56162	3.74501	2.75197	3.0471	2.78163	3.75498	3.21017	3.81865	3.34437	3.57145	3.43021	2.75781	3.21186	3.32844	2.19759	3.06509	2.97423	1.7361	3.69902	3.14374	3.63615	2.10894	3.35053	2.61712	3.10294	3.52818	4.20352	3.35174	3.38676	2.33984	2.80717	2.72969	2.50021	3.34179	2.50028	3.81561	2.0172	1.00144	3.59645	3.13866
FUCA1	4.11246	3.36797	4.12491	2.69734	3.70458	2.809	3.50008	2.94766	3.45092	3.86625	3.57091	3.79495	3.21791	3.24367	3.90326	3.50956	3.60946	3.46547	3.23832	3.75445	4.29585	3.33901	3.60423	3.33061	3.9569	3.82434	3.01237	4.14266	3.77216	5.05942	2.56371	4.0363	3.05647	3.61364	3.32912	2.92266	3.81695	3.83984	2.78483	4.80458	3.7206	3.25296	4.23433	4.10657	3.40292	3.01522	2.63589	3.73276	3.02179
PTGS1	3.32393	2.13062	2.79005	1.79169	2.93408	0.995746	2.37535	2.13367	1.43701	3.05963	5.49385	3.81317	2.34979	2.65114	2.28873	3.26291	1.79374	2.45941	5.02009	3.81877	3.75479	2.82845	3.45221	3.00711	2.9415	3.03166	1.88563	3.22429	2.10035	3.05412	0.863807	3.44626	1.69626	3.34081	2.92582	2.02145	2.90659	2.0832	1.80776	2.33771	3.91611	1.32852	3.38816	2.49603	3.41812	1.98814	0.939374	4.85425	3.48346
HSD3B7	1.58234	1.22721	2.67492	1.95981	2.37063	0.673245	2.35047	2.09492	1.46707	2.10553	1.34126	2.65161	1.50384	1.22402	2.81714	1.65663	0.975714	3.02325	1.62828	3.04009	1.99475	1.42205	1.88491	2.08063	1.30162	1.95925	1.20087	1.50898	1.63874	2.33785	1.94207	2.10399	1.68081	2.02751	2.3152	1.24839	1.84466	2.28678	1.46305	1.99616	1.74514	1.06166	2.14594	2.62323	3.00841	1.14789	0.724859	2.39062	2.47613
ELOVL2	5.69296	5.28356	4.27364	6.34257	4.9351	2.89444	3.73079	5.54712	0.648832	5.49331	5.36932	5.23081	2.33749	2.88138	4.32798	4.31025	5.90869	5.01137	6.3513	4.01918	3.69716	4.99795	2.92233	5.54452	1.30437	4.66031	4.90145	3.44954	3.42916	4.39693	4.68511	3.93193	3.07672	5.4473	5.78527	5.22267	4.78064	3.29697	3.61157	3.87343	3.26709	2.76225	3.48446	4.26088	5.85204	4.58972	3.13535	6.10157	5.54029
CA3	4.66157	0.348744	1.10133	1.00216	4.5704	0.264471	0.7934	1.03894	0.51467	3.36837	1.64147	1.17477	0.720392	0.175456	2.58583	1.11034	5.69987	2.66839	2.55829	1.40428	3.7474	3.61434	5.76886	1.15978	7.65302	1.89278	0.353856	5.6265	2.29158	3.01934	1.54353	2.20511	0.675645	1.85902	4.51996	6.5752	2.4298	5.61146	1.47242	1.80819	0.707691	0.782241	0.424237	5.58321	4.84684	0.487508	0.555826	1.61161	2.93536
NADK	4.1566	3.39842	3.45899	4.27861	3.95531	2.71758	3.49636	3.38994	3.69329	4.07581	3.36265	3.44384	3.61831	3.43793	4.00253	3.55416	3.48895	3.74262	4.16876	3.93347	3.77428	3.69238	3.60298	3.19305	3.35144	3.73142	2.92253	4.50375	3.88259	4.05994	3.48333	3.70346	3.22866	4.16008	4.04899	3.85951	4.28469	3.95537	3.40177	4.27333	3.71645	3.82662	3.7226	3.1528	3.84682	3.05454	2.75241	3.88167	3.73397
PYGB	5.42589	7.71608	6.41086	6.57222	6.88515	6.26388	5.73371	6.82274	5.87182	5.63623	5.97501	6.60135	5.78967	6.78695	6.63156	5.8816	6.50742	5.99643	6.26909	6.74379	5.36101	5.37407	5.4373	6.01183	6.12689	5.98672	5.85577	5.71547	6.28854	5.46012	6.92056	6.09448	6.16904	5.713	5.71433	6.1814	7.08099	6.27205	5.96547	6.2051	5.26504	6.17602	5.90203	6.08921	5.66282	5.95487	5.95675	6.07339	6.15769
TM7SF2	3.19989	3.30037	3.74667	3.75275	3.59746	3.70403	3.91964	4.34585	2.58008	3.54079	3.04289	3.97682	4.17424	3.95978	3.81385	3.59772	5.27079	3.64577	2.99981	2.87484	3.21549	2.91849	3.78292	3.41863	4.19463	4.11254	3.62884	2.66012	4.5243	3.57805	4.51665	2.7458	4.28252	3.70134	4.08111	3.21163	3.44313	3.71948	4.40527	4.29062	2.87602	4.10159	3.63909	3.89362	2.89197	3.52984	3.58852	2.61827	4.55001
ENTPD2	2.02444	3.92352	2.01408	1.6202	5.3126	2.14015	4.90794	5.25809	4.452	3.72016	2.22921	4.4244	1.52634	0.754215	0.372816	3.97227	6.10593	3.45779	3.8429	2.1005	3.68265	1.37876	4.02901	2.53765	4.77538	2.45367	2.1985	4.50118	5.76967	2.95718	3.77833	1.80539	3.07415	1.97519	4.37048	5.32994	1.90326	3.32653	3.06407	1.61281	1.34964	5.7388	3.71569	4.76593	4.97406	2.48311	2.90524	3.72298	2.60249
FADS1	3.98616	4.25753	4.2487	4.075	3.88326	3.49655	3.85492	3.80563	4.05639	4.99249	3.77467	4.01092	4.23423	4.48365	3.46762	4.40859	4.51629	5.21286	3.63935	2.99454	4.14806	3.47434	3.90681	4.11598	4.2345	3.92067	4.28317	3.64192	3.86432	2.89728	3.79933	3.03114	3.88623	3.97847	4.99249	4.14971	3.3658	3.38756	4.60368	3.9648	4.12571	4.2902	3.28812	4.89515	2.97225	3.89502	3.58446	3.77671	3.779
NNMT	3.6866	0.44638	1.06126	1.01472	3.61255	0.514671	1.16205	2.14392	1.11706	2.33208	2.18043	0.413303	1.6259	0.500546	5.69148	1.47034	1.07875	0.613473	1.5256	4.05144	3.38414	2.48372	5.14968	0.81758	4.72417	1.29956	0.615454	5.45062	3.89635	0.803487	2.02145	4.37159	0.294041	3.0334	4.17925	2.77311	3.44824	4.10731	1.98498	4.71771	7.07376	2.86352	1.18468	1.55732	6.12899	0.633621	1.34719	6.30102	4.40905
HS6ST1	4.34677	4.47029	4.51563	4.1457	4.61039	4.31569	4.45211	4.29173	3.91232	4.55023	3.58581	4.20773	3.6582	3.80942	5.26435	3.95894	5.19832	5.00459	4.41155	4.85535	4.41902	3.50644	4.07548	4.47691	4.58578	4.56205	4.07041	4.33765	4.02557	3.82745	5.22141	4.0841	2.9639	3.84613	4.45278	3.90945	3.85177	4.15692	3.62685	3.32309	3.55916	4.39713	4.11692	4.13537	4.4335	4.21027	5.0658	4.60561	3.95384
LRAT	0.623186	0.475677	1.86947	0.664154	4.35426	0.610832	1.7442	1.94456	1.23128	2.51749	0.174602	3.42504	0.511399	0.476004	2.41196	0.863461	2.66513	2.46162	1.21249	0.604038	2.96344	0.518947	1.56521	0.319785	1.7173	0.754027	1.16866	1.92127	2.88583	2.52757	1.53137	0.373286	1.66797	0.163835	1.18646	0.823491	0.860649	1.63311	1.29315	0.601162	1.43151	1.2436	0.524262	1.81407	0.229339	0.781085	0.218043	0.579365	0.4479
AGA	3.19248	3.47949	3.84881	2.95627	3.68684	2.20221	3.51523	2.58885	2.47848	3.39815	2.87108	3.60987	3.56122	2.50405	3.36825	3.72713	3.79798	0.87452	3.1316	3.49349	3.32021	3.5986	3.75622	2.81588	3.56975	3.24254	3.05439	4.37214	3.95402	3.35367	3.14976	3.29427	4.05777	3.1739	3.49875	3.78909	2.36661	3.57989	3.33488	3.42563	2.32934	3.23385	3.32126	3.49938	2.75923	3.14973	2.16965	2.61925	2.85233
NME5	2.80679	2.06952	2.37993	1.87912	2.56851	2.64295	3.57675	2.01723	0.519117	3.10589	1.89462	1.43536	1.10145	1.14368	2.18847	1.16732	3.28007	2.27185	1.99985	2.3607	3.57885	1.49566	4.82699	1.86605	3.74296	2.90007	1.60178	4.27065	4.16995	2.42192	2.78179	1.97802	1.51711	1.05566	1.73091	2.90127	2.1678	2.55974	2.5664	2.03493	3.28001	3.04717	1.47182	2.95098	2.11085	2.52829	2.96631	1.7022	1.75155
ALDH7A1	5.28092	6.85194	4.83925	5.4645	4.45783	4.43669	5.46646	3.96067	3.75309	5.34961	4.54737	4.65986	4.38212	3.9321	3.82345	4.38797	5.08299	4.74686	3.98388	4.46344	5.03006	4.4098	4.66483	4.41796	4.77571	5.0458	4.28126	4.48827	4.74799	4.2818	6.11036	3.84585	4.17658	4.46918	4.88205	5.51151	5.1606	4.48747	5.58048	4.18928	4.33657	6.56169	3.2565	5.10758	4.74079	4.28334	3.76845	5.00481	4.23257
NME1-NME2	1.29891	0.95268	0.855386	1.51953	0.838008	0.841752	1.41901	1.40902	2.0633	1.2529	1.75056	0.667783	1.33659	1.82642	2.08618	1.0697	0.69538	0.526005	1.39209	2.14779	0.557726	1.11099	0.37465	1.28791	0.961072	1.29715	0.872061	0.397968	1.15856	1.33431	1.41335	1.09099	0.660005	1.00395	1.38944	1.00978	1.28379	1.56239	0.936444	0.641935	1.03282	0.708991	1.57115	0.846556	2.07854	1.82041	1.13292	1.78522	2.26498
GPX3	3.84482	1.95288	2.24167	2.06493	3.99415	3.34897	1.92273	3.72161	5.8352	2.74581	4.5699	2.93935	5.13014	5.5264	4.65452	4.27224	2.64757	4.18689	4.12637	7.84983	3.11488	4.89492	2.77236	2.95698	4.21819	3.05737	2.85625	3.15342	2.45137	5.66792	3.38215	5.04044	3.50112	2.70553	2.31345	3.64454	9.00412	4.98273	4.12067	5.03592	4.0289	4.34308	3.99511	2.41793	4.42296	3.33862	4.16421	6.7696	3.06154
ADCY2	2.40695	4.82284	3.06438	3.3574	3.04264	3.68789	3.34533	3.00129	1.93014	3.15396	2.55847	2.57636	1.07857	4.22334	2.19563	1.77778	4.45473	2.98416	1.20324	2.29813	3.85835	1.78345	3.23507	3.32324	3.4895	2.43817	3.24458	3.13355	2.97142	2.3553	4.03869	0.939297	2.09167	1.96042	2.05139	3.37386	3.21671	2.9068	3.12199	2.88344	3.85115	4.76595	2.1915	2.86256	1.29329	3.28008	3.89478	2.25936	1.68502
ARSA	3.40128	2.72533	2.98867	3.25873	4.20519	3.14211	3.77772	4.36211	3.19822	3.00368	3.14975	4.52138	3.46614	2.60747	3.47607	3.41715	3.27529	3.75397	3.72911	3.79724	3.49632	3.3507	3.32483	3.02752	3.27777	4.09591	2.89682	3.51213	3.32881	3.47263	3.24167	3.54304	3.9005	4.15377	3.47142	3.44579	3.92517	4.39076	3.73282	4.90946	3.74649	3.5909	4.60479	4.08504	3.79294	2.98081	3.08293	4.34043	4.21431
TYMS	2.75795	3.74265	3.49745	2.54913	3.478	1.20331	2.47322	2.1474	3.38528	5.53978	4.12088	3.523	3.81925	3.17524	4.21838	4.93766	3.45309	4.34194	4.68017	3.44879	2.66685	4.43857	4.41807	3.47783	2.06543	2.60432	2.62364	5.90872	1.99447	4.09553	1.94219	4.37643	4.12957	4.46247	4.57288	4.35137	3.21471	3.14707	4.10596	1.68425	4.11143	2.54591	3.91577	3.83261	4.20416	2.10092	0.443228	4.20282	4.05894
PC	3.42646	4.46215	3.7029	4.5389	3.47657	4.07121	4.92278	3.79057	3.79438	4.06235	3.65591	3.72138	2.41203	4.26167	2.96108	3.64219	4.32122	3.51822	2.58612	2.60343	3.57599	3.26131	4.31068	3.76059	4.6888	4.09641	3.85465	2.8798	3.92395	2.99282	4.91926	3.14105	4.21715	2.54826	3.05048	3.35931	3.28875	3.59738	4.16306	3.81117	2.41273	4.55833	4.0428	4.38778	3.01823	4.31499	4.27438	2.91864	4.0478
TCIRG1	2.69898	0.99496	2.06029	2.29724	2.91973	0.863593	2.98035	2.32972	1.73324	4.25339	2.71996	2.88025	1.96983	1.5682	3.51124	2.36508	2.01138	2.29848	3.02951	2.7715	2.86646	1.98662	2.67754	1.55796	2.60115	3.10051	1.80321	3.06009	2.82334	3.60419	1.97965	3.26371	2.24359	3.59928	2.83823	2.66773	3.40911	4.31738	2.91865	4.73994	4.60464	2.12617	3.3581	2.80407	2.9571	1.16753	1.52791	3.57392	2.7445
ALDOC	6.4771	9.05064	6.78007	9.25741	5.82391	8.62947	8.54617	8.61509	8.22165	5.66464	6.52854	6.84254	5.8969	8.76231	6.83367	6.69835	7.10004	6.67287	4.22106	7.19702	7.05849	6.09099	3.84346	7.61638	8.43292	7.57779	8.04224	3.83654	8.06337	4.74467	8.57869	4.78321	7.62523	5.06843	5.05671	9.51997	7.45517	7.78457	8.9402	6.22996	5.97941	9.0357	6.85081	7.28167	6.24471	8.8048	8.2317	5.98096	8.03535
SCD5	7.27579	7.47682	7.7946	7.7787	7.74365	7.13474	8.06703	8.21355	8.39823	8.25039	8.15444	7.91127	7.43777	8.06722	7.44424	7.32003	7.73395	8.18974	7.23445	8.18228	7.75798	7.56055	6.14169	7.02337	8.49771	8.23146	7.28357	5.33688	7.25471	6.51289	6.92883	5.88518	8.62908	6.51934	7.12531	8.20413	7.13155	7.00529	7.49976	5.96611	6.80003	7.19416	7.03359	7.15978	6.06169	7.71242	6.52131	6.55449	7.06906
P4HA2	0.659833	0.771315	1.58343	0.456933	2.07133	1.42783	1.37643	1.19506	0.911946	1.5407	0.84421	1.17174	1.13072	0.652081	2.69238	0.851248	1.10763	1.0323	0.523714	2.10795	1.95246	1.23206	2.52728	1.33106	2.26166	1.23433	1.3678	1.47962	2.4471	1.51298	0.919905	2.0294	0.701529	1.23006	1.64344	1.64222	1.39378	2.76362	1.55164	2.86095	2.82187	0.952051	0.954531	2.1654	2.04798	1.12773	1.64719	1.85376	1.60684
GALC	2.87302	4.12614	3.34024	3.53819	3.89929	2.91154	2.01102	3.03437	2.55512	2.442	2.53877	3.72318	2.97899	2.73207	3.0863	2.74711	3.85698	3.2769	3.63215	3.74707	3.1426	3.86929	3.7814	2.8851	2.87817	2.53918	3.66715	3.03002	3.68824	3.71723	3.29533	2.76671	3.63436	2.77425	3.39654	2.55183	3.09124	3.61514	2.89813	3.52877	3.19701	2.50006	3.20331	3.7577	2.60147	3.21691	2.8661	3.74752	3.37676
PRDX6	7.00948	7.02474	6.51856	5.97537	6.46789	5.97939	7.9464	6.47745	5.54841	6.7422	6.00805	6.30366	5.55558	5.96047	6.82028	5.28831	4.95295	6.68409	6.04459	6.65838	7.34182	5.91805	7.27706	5.93287	7.23059	7.16325	5.59103	7.48409	8.05445	6.92472	6.61054	5.9915	5.54387	6.14386	6.6642	6.97141	6.16863	6.31105	6.65983	6.77908	6.64221	7.21155	5.93648	7.05675	6.7101	6.50338	5.97632	5.97071	6.20317
FBP1	2.46257	1.99591	1.85161	1.49275	1.74594	0.833757	1.76392	1.19298	1.69494	2.08343	2.69874	2.1077	1.62643	1.6764	3.08901	3.78764	1.44988	1.74233	2.18745	2.42147	2.68863	2.364	2.1234	0.756121	2.60073	2.06298	1.65061	2.04773	1.35142	4.96385	0.472282	2.6679	1.24835	2.83271	1.82978	1.72835	2.73258	3.11194	1.29353	2.85311	2.19325	0.676365	3.67376	3.9948	2.01827	0.94009	0.723264	1.84419	1.51438
HK2	3.1302	3.79408	3.05267	2.10116	3.43495	0.927538	2.9384	1.46938	2.70084	2.90754	2.65956	2.989	2.87538	2.78577	3.24075	3.03854	3.79603	3.1314	2.07376	3.39284	3.49506	3.28435	3.89666	2.21381	4.10014	4.26975	2.26295	3.53089	2.06294	3.24825	2.27978	3.63586	2.11485	3.35745	2.6689	3.68942	2.93214	4.51479	2.82331	4.02516	4.58562	3.61106	3.26612	4.11146	2.5024	2.29731	1.69875	3.97334	2.3812
EPHX2	2.99654	3.32025	2.55202	3.43991	1.97126	1.67716	4.44252	2.75352	1.6627	3.19714	1.67824	2.34454	0.854414	2.15893	2.51006	1.6131	2.40075	2.95806	1.32651	2.46358	3.59247	2.6928	3.96983	1.24434	3.75085	3.22344	1.93521	3.19006	2.69485	2.5831	2.74114	1.92968	1.64576	1.87075	0.546143	2.4951	2.03834	2.53733	2.57729	2.95423	2.09008	2.97297	1.77097	3.12295	1.52846	2.6745	1.34954	1.4008	1.79155
NT5C2	2.4056	2.70187	2.86379	2.65234	2.56446	2.45216	2.12114	2.36472	2.84954	2.78736	2.70885	2.60422	2.65648	2.9379	2.18995	2.56593	3.08386	2.50207	2.31675	2.69446	2.91212	2.23518	2.61501	2.27155	3.00905	2.81249	2.66397	2.96357	2.6451	2.30127	2.55005	2.56161	2.06226	2.70057	2.33759	2.4796	3.03786	2.21685	2.73538	3.06803	2.26663	2.84498	3.03273	2.39186	1.69538	2.3859	2.54755	2.38418	1.98583
DGKI	0.88096	1.11944	1.24281	0.221236	0.769498	2.41119	1.76023	1.00993	1.99185	1.29469	1.19663	0.611365	2.20161	2.15614	0.666259	2.21668	1.22263	1.52287	0.955383	1.04576	1.46554	2.5075	0.77312	1.95831	1.62823	0.690253	1.96538	1.95538	0.574595	0.767422	1.14129	1.51475	2.06919	1.78132	1.78316	1.47424	0.207509	0.921223	0.688416	0.43473	0.488841	1.10687	1.33209	0.62818	0.409555	1.68071	2.24228	0.285771	0.933119
NAMPT	4.25284	3.2036	3.45048	2.69746	5.74735	2.07112	3.10619	1.85923	2.51063	4.42803	2.78485	3.40098	3.56539	2.39326	6.51956	2.78901	3.41499	4.85723	3.53882	5.21754	4.57787	5.08406	5.70389	3.325	3.67907	3.40662	2.60706	4.23347	3.89196	4.74122	2.70393	4.45194	1.97219	5.06431	5.94559	3.65765	4.68474	5.98343	2.45424	5.76988	4.81004	2.09709	2.48929	4.31705	6.02793	2.61217	2.74594	6.30323	3.51696
ALOX5	2.96013	1.56062	2.60744	2.4478	2.54728	0.92673	2.11224	1.67074	1.6897	3.3628	2.98639	2.63255	2.08184	2.47093	2.89626	2.97976	1.93787	2.37739	2.14078	3.24239	3.3188	2.60166	3.42624	1.14336	2.92701	3.1434	1.80164	2.75758	2.32654	4.00444	0.642473	2.63917	1.66139	3.33471	2.52921	1.86648	3.5138	3.99366	2.27888	4.01213	3.71928	1.36286	3.34628	3.10124	1.81184	1.45347	1.13144	3.16398	1.54628
NDUFA3	4.52235	4.2239	3.97367	4.91151	3.84929	4.44246	4.62823	4.69386	4.2204	4.32028	4.66437	4.28273	4.54263	3.71588	4.54131	4.18573	3.90644	3.9082	4.83008	4.18679	3.74311	4.07538	3.96615	4.35056	3.84919	4.08737	4.10888	3.87751	4.5608	4.18972	5.09546	3.87825	3.80026	4.26054	4.04464	4.71366	4.75151	4.47137	4.59328	4.2064	4.6002	4.92385	4.26253	4.48954	5.64443	4.43042	4.2674	4.33379	4.89816
POLR3D	2.86003	2.22512	2.6452	2.15408	2.55141	1.84528	1.66594	2.05525	2.63401	2.6622	2.8627	2.34261	3.20263	2.76145	2.57355	2.79404	2.68044	2.68239	2.95131	2.79231	2.18809	3.45768	2.33683	2.2787	2.67805	2.64238	2.16641	2.64998	2.00312	2.55302	1.89847	3.07272	2.53419	2.76171	2.10584	2.2856	2.6074	2.41154	1.83714	1.92421	2.67129	1.59369	2.61788	2.08806	2.74269	2.07128	1.86455	2.88144	2.62098
PLOD1	4.54635	3.99122	4.43197	4.16514	5.00567	3.43133	3.50062	4.44715	4.21296	4.71918	4.87939	4.65782	4.46698	4.28787	5.22901	4.08388	5.04459	4.38959	4.66606	5.40798	4.1544	4.28635	4.56846	4.27546	4.51065	4.52256	3.61705	4.88058	4.5826	4.35796	3.62628	5.57632	3.07718	4.62698	4.42791	4.75107	5.04342	5.68109	3.78768	4.34873	5.10411	3.50087	4.87596	4.2731	5.36305	3.96528	3.32033	5.60816	4.54689
SCD	6.45509	7.75942	7.08807	6.24717	6.75453	7.34787	7.39312	8.08014	6.01515	5.95687	6.70905	8.87246	6.83016	8.05066	7.00774	7.69154	8.7843	6.33181	5.11406	6.346	6.41025	5.74412	6.38341	7.22937	6.64172	7.1525	8.50307	5.05114	7.11573	6.5651	7.74436	6.8824	7.55865	6.38796	6.82832	6.89133	6.46248	5.64888	8.48927	6.76617	5.94187	7.05755	7.81756	7.96388	5.00038	8.69027	7.15012	5.49182	7.17138
FDFT1	3.69543	4.70705	4.70344	4.26078	4.33398	4.47617	4.13568	4.7938	4.24805	3.56294	4.11675	4.54638	4.36505	4.87695	4.83256	4.98335	4.06675	4.24765	4.02354	4.00244	3.77361	4.00889	3.86521	4.7132	5.03374	4.40149	5.14445	3.67916	4.12938	3.50699	4.47289	3.88272	6.40116	4.15701	3.61972	4.64789	4.42613	3.55835	5.24447	4.00512	3.62055	4.68139	4.96488	4.49612	3.01555	5.03853	4.74627	3.47474	5.14906
ACSL3	4.54452	4.49205	4.40338	5.65778	4.62674	4.70514	4.60409	4.75822	4.68846	4.09918	5.34636	4.51988	3.32805	3.75999	5.36424	4.16549	4.39591	4.43863	4.89362	5.76052	4.35332	4.90199	4.13864	4.89905	4.30373	6.5055	4.98703	3.89905	3.93689	3.5057	4.41118	4.84722	4.0746	4.30448	5.00801	5.08128	4.5888	3.18469	4.81748	4.42987	3.89986	4.31012	4.09071	4.13309	4.91548	5.49857	4.9532	4.84655	4.75669
AK2	4.17061	3.54609	3.56307	3.80518	3.92381	2.29783	3.5201	3.29565	3.73826	4.34039	3.92373	3.93328	3.42513	3.46357	4.30712	3.73285	3.23394	3.86428	3.84235	4.12047	3.67008	3.72982	4.53441	3.06276	3.63318	3.85826	3.02674	4.67473	3.75484	3.91154	2.75079	4.24479	3.02388	4.03361	3.85943	4.08874	4.21143	4.3861	3.90818	4.13196	4.31095	3.45859	3.52373	3.68223	4.18772	3.0389	2.39343	4.16473	3.79613
PIK3CD	2.43234	1.3214	1.97559	1.34174	1.94137	2.11382	1.62917	2.20458	1.86556	2.51266	2.1929	2.16514	2.3067	1.71236	1.77788	1.91183	1.58929	1.64248	1.79004	2.44445	2.78825	1.60779	2.1915	1.5986	2.13564	2.1705	1.93378	2.5156	1.28497	2.38859	1.02872	2.16912	1.29112	2.55904	1.87645	1.15855	1.85485	1.84003	1.34652	2.74826	2.50162	1.12999	2.46188	1.53604	1.26837	1.75946	1.85342	2.14345	1.19814
LPCAT2	3.04207	1.63648	2.79316	1.70612	2.36237	1.19407	2.44627	1.74996	1.32845	2.68048	2.63446	2.72236	3.38546	2.59878	1.69732	2.39625	1.31256	1.96912	2.19442	3.25125	3.49951	1.84668	3.89581	1.01208	2.84951	3.13548	2.54344	2.61632	1.84116	2.61695	0.690247	2.16609	1.87709	2.84069	2.73117	2.28279	2.03084	1.3118	2.35336	2.57723	3.52689	1.13746	2.74488	2.45025	1.16379	2.16847	1.49227	2.3008	1.69477
COX6B1	7.02794	7.02023	6.98202	7.22784	6.52403	7.07589	7.13706	7.04909	6.9602	7.07803	7.34711	6.99172	7.03701	6.81318	7.69565	6.67382	6.87251	6.45237	7.14012	6.82401	6.43062	6.33867	7.05838	6.81107	6.61859	6.72383	6.93651	6.68041	7.07055	7.1286	7.66225	6.60316	7.02754	6.11442	6.63557	6.98019	7.55863	6.87195	7.04504	6.84282	6.83117	7.36085	7.11364	6.84064	7.9788	7.42335	7.11346	6.97892	7.57522
H6PD	3.69211	3.66031	4.08258	3.12991	3.67592	1.7619	2.41785	2.87186	3.28112	3.77868	2.92368	3.61479	3.50175	2.94802	3.30746	3.1396	3.32711	3.8212	3.90572	4.22876	4.34066	3.64906	3.28474	2.88783	4.13253	2.85016	2.55894	4.33998	3.82221	3.24014	2.24202	3.46108	3.04444	3.6343	4.05278	2.91226	3.02682	3.78321	2.84287	3.44224	3.99093	2.68745	3.70034	3.14659	2.87666	2.67621	1.64218	3.99882	3.4145
HPD	1.13124	0.506589	1.08007	0.117347	0.745067	0.0566441	0.65688	0.766009	0.048413	1.12879	0.431571	0.679228	0.24352	0.172227	1.24194	0.604566	0.0254692	1.36152	0.595898	1.5113	2.17597	1.05423	1.8344	0.176761	2.42797	0.429109	0.0934301	1.35183	2.34369	0.254721	0.234106	0.261159	0.495576	2.07131	1.27461	1.25401	1.31645	2.33737	2.01738	1.82201	1.2536	0.349883	0.272767	0.704797	1.27186	0.0778939	0.102594	1.40023	1.00659
GLYCTK	0.848261	1.50953	0.949467	1.21303	1.29684	0.703876	1.26842	1.18094	1.55161	1.65589	1.20983	1.27215	0.771832	2.11933	1.11238	1.1639	0.937179	1.02636	1.52335	1.55169	1.67495	2.10885	1.00261	1.123	1.17912	1.74645	0.870013	2.04724	1.57132	2.76921	1.45834	1.34335	1.09753	2.24954	1.46255	1.60307	1.09791	2.02739	1.51611	1.43475	1.08995	1.89926	1.49269	1.13993	1.1545	0.959926	0.787559	1.25634	1.70641
RDH10	2.36803	2.64807	2.39097	1.769	4.1464	0.861034	2.55277	1.42102	2.08244	3.62961	1.62211	1.88667	2.70401	1.38427	4.52322	1.72959	3.23723	2.64319	2.65703	2.93959	3.85481	3.7875	3.37048	1.96265	2.853	2.7593	1.41826	3.6224	2.24828	3.26848	2.39648	3.86062	1.26184	3.24215	3.85588	2.15375	2.68359	5.44841	1.72752	1.97769	3.06884	1.63467	2.00428	2.36783	2.81044	1.4539	1.31444	4.56845	2.20657
SCP2	4.62222	4.34199	4.0961	4.08999	4.29374	3.0034	4.51273	3.6373	3.98915	4.2059	3.92022	3.94816	4.24399	4.12732	4.16473	3.71101	4.29673	4.20626	3.8807	4.17823	4.45689	3.92801	4.93157	3.68751	4.33558	4.51954	3.51528	4.76335	4.35211	4.37989	3.37269	3.94002	4.32904	4.06985	4.33299	4.41318	3.95909	3.96907	4.00608	4.07323	4.2253	3.88503	3.51426	4.15897	3.7695	3.89139	3.23789	3.94172	4.02822
PYCR1	3.93095	3.72417	3.32559	2.94811	3.53231	2.0236	2.97346	3.13535	4.42783	3.99517	4.31878	3.3126	3.87574	4.40049	2.86976	3.7025	4.59945	3.58161	3.44875	3.75677	3.0995	4.50468	1.82337	3.23917	2.94233	3.85038	2.69819	2.37607	2.91243	3.86202	2.65408	3.4554	3.17039	3.868	4.02836	3.82719	3.89337	4.09756	2.83358	3.09794	4.25834	2.84882	3.8854	3.43353	4.3099	2.65751	1.96396	3.87021	4.0911
TYMP	4.23786	1.02852	1.69896	2.23888	2.39644	0.227497	1.75421	1.36425	1.54578	4.76519	2.6799	2.45528	2.60121	1.49409	3.79152	2.66091	2.48484	2.04583	2.20817	2.496	4.1037	2.70298	3.82733	0.925315	2.6303	4.09756	0.711606	3.78716	2.60865	4.3722	1.02261	3.35166	1.03415	4.50773	2.84781	2.44285	4.41288	5.06465	1.34671	5.69229	4.88706	1.21226	4.15397	3.08007	3.41936	0.836471	1.18098	3.79	2.26079
MPST	2.71963	2.75554	1.70655	2.53303	2.67929	1.55367	2.14968	2.82675	3.19644	2.2492	2.65886	2.66281	2.72015	3.04962	2.53552	2.79763	3.02869	2.74331	3.03514	2.32923	1.98355	2.19929	1.54219	2.32324	1.85853	1.7524	1.75853	1.91513	2.20237	2.34757	2.85408	1.90341	2.8597	2.7676	2.80724	3.43493	2.62764	3.2256	3.20477	2.79836	3.12461	2.98233	3.24798	2.68827	3.01664	1.99399	1.4165	2.73379	3.26627
CHST3	2.41952	1.79757	3.13281	1.73711	3.34993	1.83375	2.64872	3.26664	3.13403	2.73647	2.7101	3.95666	4.81003	3.92	3.80946	3.40108	3.50244	2.9059	3.23284	3.98052	2.87301	2.64033	3.42766	2.70766	3.56761	3.5446	2.41063	3.19287	2.88472	2.6151	2.12595	3.69482	3.61641	2.63245	3.1074	2.2236	3.2242	2.35539	2.91863	3.05692	2.74644	2.8823	4.11397	3.15848	3.07985	2.95722	2.3886	2.96447	3.11762
PGM2	3.52035	3.25201	3.19463	2.18752	3.79626	1.48548	2.8382	2.16359	3.03157	3.57127	3.23812	2.79672	3.58043	3.03623	3.49152	2.82515	2.39037	3.02803	3.29763	3.88117	3.92086	3.29425	3.93727	2.68687	3.08378	3.43688	2.32057	4.20411	2.23594	3.37666	1.94533	3.75393	2.81913	3.2042	3.79688	2.84551	2.71875	2.98768	2.32977	2.69977	4.04692	2.34021	3.4317	2.83378	3.06886	2.49206	1.75913	3.36177	2.41717
CRYL1	4.95247	5.72182	4.99687	5.8541	5.20474	4.4547	5.69824	5.50893	4.87063	4.5649	5.13392	5.37603	4.52803	5.54934	5.35516	4.85347	5.83953	5.07851	4.26098	4.78148	4.87105	4.10366	3.89665	4.16278	4.59344	5.36281	4.71192	3.73962	4.89307	4.9573	5.99044	4.53363	6.23036	3.95546	4.66383	5.6622	4.47633	4.5772	5.87842	4.91867	4.20691	5.71039	5.11441	4.6681	4.10734	5.45112	4.56349	4.47716	5.01909
HYAL2	3.25138	3.02181	3.38283	2.93995	3.81016	2.09765	3.47257	2.95693	3.42634	3.4855	3.74809	4.04509	4.10545	3.06436	4.25048	3.29367	3.92504	3.46122	4.17904	3.93821	2.89143	4.15598	2.96758	3.32651	3.37057	3.3438	2.86108	3.20499	4.35201	3.71026	3.24706	4.44612	3.30978	3.43913	3.56442	3.83969	3.65476	2.82553	2.71713	3.98434	3.91298	3.223	4.1086	3.57512	4.4029	3.77025	3.30482	4.32048	4.5282
GBGT1	1.59983	1.18792	1.62196	1.6358	1.50253	0.759802	1.70053	1.34903	0.877349	2.05674	1.5871	1.63867	1.72395	1.16396	1.7965	1.29345	0.9969	1.38591	1.13079	1.51885	2.08672	1.0686	2.11035	0.688096	2.2964	1.86839	0.889567	1.81103	1.62813	2.10805	1.02063	1.60069	0.901831	1.42852	1.06149	0.77084	1.86629	2.28841	1.63626	2.77513	2.05874	1.03314	2.15883	2.01207	1.12752	1.03596	0.835272	1.67883	1.08446
TK1	1.83127	1.79017	2.23278	1.87492	2.30555	1.01989	0.978716	0.887517	3.69232	2.68324	3.11993	2.62451	3.55973	2.24828	3.87898	3.73975	2.19808	3.02768	3.67328	2.70876	2.2657	3.76824	1.68235	2.55902	1.59225	2.09733	1.62587	2.35126	1.93492	1.93066	1.42377	3.58587	1.12208	3.47139	3.26531	4.10233	2.91418	3.16096	1.70562	1.60833	3.91065	1.84629	3.3473	2.29714	3.47972	1.26637	0.464772	3.62007	3.4641
BLVRB	4.50206	4.53981	4.47664	4.61387	4.16354	3.66579	4.682	4.65404	3.09257	5.12541	3.97406	4.24158	3.01094	4.19226	4.5886	3.48721	4.29332	4.66529	3.29883	4.35077	4.28066	3.17838	4.03256	4.12955	4.73855	4.17516	3.84162	4.20324	3.96476	4.42954	4.94644	3.96121	3.52392	3.31174	3.84081	3.78442	4.67787	4.54232	4.2407	5.03133	4.38146	4.56526	4.28866	4.86419	4.70984	4.10068	3.92578	4.31997	4.47819
CP	1.86054	0.466143	3.98904	0.306319	4.39476	0.118694	1.94968	2.52415	1.18636	4.05426	1.93701	3.52312	2.2776	2.00379	2.71143	1.65258	0.179618	4.47988	1.81036	3.7472	4.34946	2.97556	6.27681	2.05661	4.72477	1.70714	1.45295	5.6477	2.0743	2.52318	0.445596	3.2585	0.53623	2.06946	3.30165	0.705918	3.18087	3.57364	0.925781	3.98648	2.10276	2.20488	3.4376	3.26788	1.91178	0.699281	0.891056	2.91788	2.11776
GPT	1.08418	0.952617	0.775208	1.78443	0.99223	1.12892	2.11048	2.34774	1.64785	1.42544	1.00013	1.3697	0.253566	1.34825	0.405166	0.704232	0.68331	0.881211	0.805435	0.559588	0.874762	1.00483	1.42414	1.06527	0.945485	1.22192	1.14999	1.02778	1.42932	1.07188	2.13546	0.650016	1.03582	1.7301	0.608944	1.32236	2.18514	2.67142	2.26251	3.01494	1.07579	3.37043	1.11678	0.829295	0.976554	0.971107	1.40133	1.06672	2.02319
PFKM	4.20892	4.59463	4.88982	5.35642	4.48443	5.15798	5.29868	5.19112	4.54905	4.30773	4.78364	4.12414	4.18944	5.05886	4.70126	3.9637	4.43179	4.7035	4.46204	4.74405	4.33796	4.47454	4.37863	4.83183	4.74329	5.49487	4.91489	3.97692	4.98223	3.42466	4.93489	4.19674	4.28266	4.27622	4.53569	4.31698	4.45936	4.56276	4.5318	4.26555	4.89933	4.71514	4.13387	4.30646	4.0454	5.41405	5.25647	3.94137	4.60668
ALDH1L1	4.37224	5.05109	4.37814	5.23091	3.48517	3.28772	4.5685	5.05801	2.12239	4.24775	3.48257	3.67368	1.16829	2.43807	4.55692	2.74869	2.9666	4.45083	2.34855	4.45115	3.71354	3.4347	3.95203	4.45953	4.41435	4.33797	3.58422	2.39448	2.58471	3.68389	4.05886	1.99319	2.1615	3.61472	2.00167	3.94042	3.3168	3.66047	5.59291	4.46984	3.3575	7.00548	1.52051	3.41041	3.6259	4.43003	2.65926	2.02565	2.32506
CD38	2.97259	4.46382	2.1027	2.37488	3.37542	1.10956	3.2696	1.07816	1.75613	2.89811	2.34289	2.58819	0.822659	3.46456	2.15769	2.52675	4.35692	3.64561	1.86755	1.27037	3.65335	1.77398	3.988	2.357	3.74652	4.07613	2.03558	3.62961	4.48268	2.59574	3.73562	0.979574	0.972805	2.02167	2.93158	3.25311	1.60587	2.50829	3.07636	2.95589	2.43815	0.841174	3.4316	4.03266	2.03693	2.23495	1.31629	0.761836	3.33757
QPRT	3.10354	3.77152	2.47982	1.68419	3.87736	2.25531	4.37013	4.0185	0.928661	2.73902	2.843	2.97566	1.63278	3.37407	3.30646	3.03126	3.18515	3.21125	1.88542	4.13939	4.145	2.75356	3.6982	3.01888	4.32294	3.21991	3.1339	2.19817	3.97094	3.28317	3.70388	3.53929	4.75648	3.62946	2.76218	3.56791	2.45684	3.49145	2.91664	3.96457	2.23876	3.39706	3.14057	4.93372	1.33307	2.93644	2.39241	2.01849	3.88788
SHMT1	1.78004	1.64248	2.40954	2.53827	1.73719	0.939755	1.86733	1.80103	1.40303	2.99515	2.21585	1.99934	2.02672	2.03062	1.86064	2.06342	1.48821	2.28022	2.19514	2.53844	1.82083	2.39249	2.60366	1.27529	2.15719	1.71422	1.42208	2.68957	1.83117	2.14474	1.6767	2.07951	0.915124	2.2221	2.33014	2.28075	2.96113	2.78055	2.14521	2.33855	2.03693	2.38637	2.96565	2.45728	1.9228	1.51819	0.972681	2.24485	1.97779
FADS2	4.82918	6.30087	5.25415	5.71151	5.24285	3.92124	6.04893	5.5505	6.72787	5.99084	5.46654	4.60127	6.14054	6.20614	4.949	6.30814	6.21203	6.27429	5.26474	4.29669	5.82728	5.0379	4.50936	5.79997	6.03415	6.45032	5.0383	4.7912	5.9081	4.29548	6.25963	4.02902	4.75673	6.26509	6.45989	6.44139	5.68444	5.45414	5.50606	6.08954	5.05119	7.14371	5.37333	6.57845	5.61687	4.97146	4.2102	5.86915	6.17792
ALDH1A3	0.735735	0.278531	2.19858	0.0915787	0.26188	0.947912	0.868269	2.67788	0.740183	0.589817	0.828091	1.23142	0.209105	0.0502044	0.217146	0.264576	0.295464	0.412573	0.0437922	0.961116	1.22164	0.0872559	0.308459	0.768181	0.362667	1.29814	1.95779	0.207349	0.520853	0.361169	0.391149	1.44877	0.773448	0.0519162	0.173969	3.55351	0.661556	0.306397	0.67192	0.195879	0.239462	0.564725	3.14734	0.591244	0.0265729	1.53398	0.994079	0.0987088	0.388394
PLA2G2A	1.46427	0	0.0403752	0	4.05226	0.0302897	0.264259	0.662375	0.194915	3.19513	3.41823	2.01245	0.758237	0.0398305	3.45575	0.367135	0.0225146	1.28691	0.798273	1.79072	2.1593	2.9455	1.07789	0.0246965	2.7407	0.0804621	0.0253471	3.71733	0.0166905	0.436414	0	1.71287	0.0127842	4.15024	2.42262	0.528919	0.0906989	6.41096	0.0728199	4.98511	0.0762213	0.208903	0.0648106	0.215606	3.65624	0.0262637	0.0416473	3.95498	0.513004
POLR2I	4.22272	4.55173	4.33318	4.74733	4.46991	4.42691	4.84149	4.64793	4.30302	4.75324	4.35294	4.25544	4.64298	4.43573	4.79128	4.32674	4.31396	4.10277	4.64624	3.92551	4.08242	3.74071	4.77017	4.40894	4.33562	4.11978	4.30689	4.65239	4.84701	4.43977	5.44284	4.09462	4.49247	3.81927	4.43499	4.41245	5.30736	4.56816	5.11832	3.78402	4.38223	4.86202	4.86844	4.81155	5.40501	4.57634	4.33154	4.7358	5.15328
RRM2	1.17338	2.66615	2.56063	1.73069	2.99763	0	0.230419	0.188322	3.09037	3.39025	2.69481	2.12657	3.14524	2.28051	3.02501	4.1051	2.47083	3.35098	4.12358	3.04251	1.63665	3.87161	2.29295	2.49302	1.06005	1.93876	1.74186	3.70143	0.759134	1.86664	1.11241	4.05458	0.398144	4.25659	4.23374	4.00536	2.48761	2.64879	1.18673	0.638397	3.17754	1.0325	2.80348	1.95463	2.70462	0.757307	0.0837363	3.59094	3.03184
NAGA	3.99576	3.04616	3.73402	2.83402	3.79121	2.00526	3.09479	3.17179	3.29413	3.99292	3.71699	3.84743	3.52972	3.64842	4.30799	3.87847	3.30946	3.70749	3.71109	4.43826	4.53896	3.87293	4.34264	3.11335	3.7765	3.82206	2.88962	3.8319	3.05513	4.10889	2.44496	3.7274	2.45627	3.93717	4.08144	3.46825	3.30143	4.01066	2.25104	4.18846	4.31469	2.32061	4.33351	3.84226	3.38214	2.53157	2.26426	3.67466	3.21165
ALDH6A1	4.08772	5.49421	4.95047	5.77507	4.50891	4.93743	4.25923	4.5655	3.60203	3.64838	4.06805	4.62982	3.23225	4.69723	3.83424	3.36825	4.55173	4.86865	4.08393	3.68214	3.33378	4.19433	2.72347	4.28353	3.33906	4.16444	4.76101	2.71088	3.52382	4.13176	4.70402	2.74821	4.48172	4.63258	3.89304	3.92049	4.16342	3.95712	4.53991	3.88932	3.15454	4.56063	3.64168	4.33191	3.67046	4.37007	4.31492	4.01932	4.2356
B3GALT4	2.27689	1.06639	2.00878	2.1348	2.12032	1.78052	2.02738	2.62179	1.72048	2.65991	2.11241	2.24119	1.91254	2.08519	1.88939	2.24638	1.67006	2.28733	2.41727	1.6885	2.21402	1.5148	1.86729	1.99353	1.37955	2.02113	1.93616	0.996469	1.85989	2.23072	1.83317	2.04455	2.55174	1.75652	1.49694	1.45283	2.59732	1.88296	1.94176	2.63736	1.20882	1.37697	2.77458	2.10291	1.39316	1.92797	1.84976	2.1169	1.83298
IL4I1	2.85805	0.407506	0.284142	0.750692	0.630966	0.0783304	0.791828	0.422785	0.561214	2.13394	0.981318	1.03836	0.9523	0.392713	1.51769	1.13465	0.819818	0.541632	0.588043	0.540173	2.23721	1.26277	1.82403	0.28175	1.10634	1.72725	0.335924	1.49226	0.794436	2.16718	0.468389	2.02412	0.261777	2.20609	1.01181	0.405356	1.27131	2.29178	0.278249	2.87658	1.96472	0.445655	2.33047	0.471435	0.598686	0.210405	0.157731	0.928813	0.475696
ST3GAL5	3.18042	2.4573	3.5658	2.91456	3.08322	3.59666	3.55326	3.79395	3.94327	3.20502	3.15212	3.32644	4.01901	3.17834	4.08104	4.11022	2.1517	2.96545	2.79414	4.38733	3.10651	2.73711	3.57485	3.73843	4.10173	3.65957	3.82862	1.66385	2.53653	2.73211	3.19688	3.79053	4.86406	2.91242	2.13253	3.27491	3.44282	3.51431	3.73136	3.8534	2.97391	3.60849	3.9117	3.00301	2.4966	4.08978	4.09071	3.14111	3.47432
DTYMK	3.61894	3.74699	2.88239	3.73841	3.97577	1.9067	3.58057	3.18714	4.1057	4.15693	4.23841	3.45964	3.58467	3.38264	4.2303	4.20172	3.46251	3.89516	4.39575	4.00572	3.47773	3.91784	3.25076	3.38355	3.46562	3.52568	2.41133	4.43434	3.53698	3.55278	3.74225	3.92464	3.19385	4.22145	4.4986	4.84234	4.20588	4.49598	3.67286	2.79885	4.23197	3.807	4.07258	3.49816	4.69052	2.61683	2.0121	4.21397	4.32045
ITPKB	6.58836	8.26185	6.08387	5.59798	6.0582	3.96823	6.30156	5.85253	3.24339	6.18115	4.7304	6.39243	4.13718	4.86085	5.07845	4.65227	5.42108	6.57022	5.16002	5.30773	6.8487	4.5572	6.42646	5.43151	6.05363	6.6179	5.45661	5.11938	6.20536	4.85743	5.65818	4.46813	4.47377	4.39403	5.46333	3.63887	5.31522	5.47706	5.28862	6.34332	5.54336	6.63453	5.55863	6.83196	6.24672	5.56623	4.26368	5.73067	5.46291
PCK2	2.58436	2.1702	2.3041	3.02693	2.10957	1.66734	1.98726	2.9573	1.25873	3.00853	2.06277	2.03218	1.91522	2.09902	1.69048	2.31362	1.79779	1.97278	1.43224	1.73317	2.42976	2.1184	2.82618	1.2585	1.78093	2.409	1.53607	2.10387	1.82819	2.68013	1.9647	2.13208	1.1604	2.00689	2.02406	1.42745	3.55315	2.49722	1.25388	3.44227	2.62982	1.55722	2.60906	2.91403	2.00152	1.37022	1.5028	2.32344	1.82948
RENBP	3.83778	2.29546	2.66259	2.90348	4.38184	1.99302	3.92857	3.88989	2.30451	2.94574	3.06663	4.12458	3.58952	2.30123	2.88243	3.7077	1.50711	4.02207	2.53059	3.82723	3.90153	2.41985	3.06853	2.90666	3.14888	3.34128	2.88385	3.043	4.37834	4.29927	2.64549	3.57298	4.93794	3.78342	3.32279	2.44256	3.93668	4.48141	3.51906	5.51154	3.49504	2.34361	4.75088	3.98506	3.23923	2.95549	2.56713	3.18882	4.13438
WARS	4.25777	3.17793	4.15245	3.47626	4.25625	4.42881	3.1605	3.58236	3.14168	4.30292	3.73307	3.87738	4.23708	3.47529	4.47592	3.82206	3.63401	4.78775	6.23612	4.7276	4.86427	4.1044	4.88651	4.27758	3.51413	4.73501	3.69724	3.542	3.62121	4.1776	3.32844	6.66898	2.9968	5.96097	4.36328	2.97035	5.38089	5.38793	2.82894	6.2379	5.17898	3.10904	4.80693	4.58181	5.70778	3.65478	4.05011	4.68294	4.13277
CMPK2	3.8411	1.19268	1.15478	2.78016	1.72935	1.42822	1.21909	1.07251	1.32073	2.58282	1.22993	1.17108	1.51384	1.12465	0.856345	1.92244	1.25092	1.7807	2.56914	1.00696	2.34108	1.8333	2.16981	1.5678	1.7228	3.84596	1.41664	2.52488	2.20751	1.9424	1.78592	2.069	0.806972	3.73709	1.39289	1.5644	3.27837	1.04788	1.0136	5.43594	3.62016	1.09979	2.0123	1.68745	1.81521	1.41651	1.61943	1.54291	1.62622
INMT	0.826534	0.638086	1.60622	0.153218	2.3602	0.251707	0.828544	0.666334	0.405883	0.243787	0.537518	1.59352	0.397963	0.252108	0.484614	0.360967	0.103769	0.695922	0.942706	0.819868	0.880283	0.118978	0.762697	0.512545	2.22127	0.248684	0.179763	0.379771	0.509914	1.19845	1.46448	0.939886	0.128678	0.864458	1.58066	0.51544	3.71689	0.628667	0.801471	1.25842	1.16013	0.627011	0.535542	0.463204	0.897379	0.126568	0.251006	0.575368	1.2173
ENO1	8.92731	8.17629	8.35844	8.29748	8.32748	8.06287	7.58212	8.39915	8.68546	8.76623	8.18959	7.93703	8.12521	7.89191	7.99612	7.70027	8.01715	8.03673	8.00271	7.999	8.16675	7.45774	7.30134	8.12894	8.36375	7.77974	8.15585	8.27335	8.27741	7.48413	7.8128	8.68223	7.0953	7.46019	7.88898	8.37723	7.86953	8.75394	6.37109	7.74182	8.6918	7.73278	8.33479	8.04632	7.76451	8.02721	8.07207	8.65346	8.16612
CHST14	3.43903	3.09144	3.64984	3.31854	3.47488	1.02879	3.06471	2.98434	3.38425	3.82863	3.57148	3.31061	3.88195	2.99587	4.05811	3.54308	2.94272	3.88621	3.98672	3.86584	3.13316	3.40485	3.55549	3.0966	2.71634	2.87943	1.99998	4.11181	3.00299	3.63484	2.98832	3.48121	2.75108	3.55484	3.99848	2.68981	3.65066	3.24322	2.97874	2.41543	3.63616	3.35697	3.32672	2.47965	3.5974	2.11302	1.07989	3.86453	2.50664
PLA2G4A	2.78616	1.45098	2.19592	1.53993	3.2055	0.917707	1.4353	1.06632	1.58639	2.47917	2.14699	2.18064	1.43991	1.77282	2.22774	2.15555	1.00344	2.83381	1.64358	3.17836	3.61979	3.21499	4.5973	2.17356	2.37456	2.36165	1.74094	3.7517	2.16946	2.7603	1.10295	1.68464	1.73631	3.69531	3.18397	4.16489	1.36179	2.95448	1.85176	4.08314	2.31274	0.870223	1.81361	2.59331	1.7075	1.86739	1.73252	1.47184	1.23222
PYGM	2.28297	4.70386	2.66187	3.80054	0.491818	2.65137	6.11971	3.40453	0.451029	2.9848	2.17703	2.08176	0.822235	1.51721	1.2181	1.50535	1.11274	2.76879	0.573465	0.88248	4.36058	0.786443	1.97903	2.75243	3.94514	6.40545	2.84616	1.62418	4.01003	2.97162	5.02983	0.874713	1.21338	1.9619	0.563465	4.56044	1.05785	2.2342	2.26709	3.95483	1.24436	3.83758	2.20451	4.45416	0.774734	4.08137	3.47155	0.600087	1.90724
GSTM5	1.09537	1.25603	2.08122	1.05199	0.412288	3.54245	5.90511	3.18214	0.275345	3.56567	0.717636	1.4484	0.808014	0.822729	3.48269	0.709865	0.165051	0.24381	0.0762012	2.31482	1.67483	0.70432	1.84784	2.28124	2.3227	3.36576	1.12409	2.2355	4.41773	1.98028	2.27144	0.570396	0.250428	0.511554	0.574742	0.918353	0.5737	2.19808	4.16548	0.323391	1.49327	3.48497	1.19868	3.25717	0.0576755	3.23293	1.51481	0.200254	1.6112
CBS	0.318122	0.451337	0.642866	1.05418	0.535831	0.669076	0.403571	0.533512	0.623895	0.558954	1.24291	0.820521	0.546388	1.05637	0.332336	0.477198	1.8295	0.878185	0.68856	0.236097	0.647577	0.546141	0.254997	0.5255	0.494916	0.36615	0.136224	0.178197	0.276104	0.414347	0.0812675	0.374548	0.762289	0.868603	0.74856	0.0707576	0.9485	1.3317	1.68015	0.81253	1.39064	2.4657	0.564797	0.374793	0.620682	0.537651	0.519969	0.80147	0.565055
POLD1	2.23433	2.03671	1.96979	2.5973	2.20944	0.798755	1.90219	1.78093	3.0903	3.1634	2.84963	2.23901	2.37385	2.05167	2.54445	3.0887	2.25636	2.71504	3.55765	2.07924	1.74257	2.81233	1.94071	1.76868	1.95433	1.97978	1.44107	3.12531	2.083	2.52959	2.47255	2.57288	1.61605	3.18753	2.74776	2.93523	3.22193	3.30404	2.46247	2.31297	3.01355	2.09713	2.82471	2.11049	3.0088	1.15073	0.97707	3.2955	3.42708
SAT1	5.62037	4.09607	6.18834	5.83099	6.13282	4.83616	6.04863	5.57612	5.76712	6.41382	5.77826	6.11972	5.76122	5.29205	7.69373	5.97695	5.56617	5.61929	5.43712	8.50088	6.21207	5.32475	6.51875	4.74053	6.4733	6.20711	5.55019	6.57306	6.65131	7.13101	5.15282	7.29946	5.59032	6.2359	6.62511	6.02545	6.91079	7.88423	6.29267	8.31905	7.01096	6.05417	6.74386	6.22476	6.55027	6.28033	5.96854	7.45049	6.13607
GPX1	7.43428	6.37495	6.9747	6.93501	7.50035	5.52697	7.29003	6.84105	6.48893	7.51732	7.56362	7.46846	7.64356	7.11063	7.90673	7.61139	7.09762	6.98719	7.1258	7.03106	7.22228	6.96255	7.21015	6.43924	7.34854	7.31609	6.10545	7.00087	6.95381	8.22746	6.54541	7.49108	6.69393	7.36124	7.01154	7.22925	7.51035	7.50853	7.39886	8.10982	7.50737	7.05007	8.42231	8.08682	7.34718	6.39053	6.27316	7.26915	7.3783
ABAT	6.1836	6.20891	6.37579	6.95912	5.53551	5.48001	6.08194	4.96944	6.59341	4.50367	5.72557	4.25303	6.12752	5.59006	4.66259	5.58023	6.31405	5.40923	5.88524	5.10889	5.479	6.13136	5.18213	5.22704	6.16262	6.1638	5.27985	4.82444	5.04774	5.05035	5.88543	4.94743	6.11381	5.47822	4.84528	6.18429	5.01955	5.11906	5.68402	3.77272	4.31161	5.52112	3.77345	4.96564	4.45278	5.85632	5.28331	4.684	4.81169
ETNK2	1.47104	4.8539	2.43831	1.48684	1.78986	2.30371	2.08466	2.73012	2.89961	2.81807	1.68823	1.6184	3.0787	1.91205	2.52107	5.24349	3.0697	1.71321	1.66355	2.11849	1.95404	1.89951	2.53191	3.70182	2.15895	1.99921	1.48706	2.80136	2.57819	2.27406	2.29382	1.94082	3.32887	5.79428	1.14524	3.4249	2.23118	2.50207	2.00671	7.0527	2.05386	3.20644	2.17897	5.2499	0.805067	1.8477	1.82	1.55211	1.93854
BCAT2	1.81417	1.86087	1.81592	3.06135	2.36886	1.72961	2.51891	2.32118	1.74943	2.8541	2.01611	2.23078	1.6184	1.6919	2.20579	1.99437	1.83588	1.99439	2.61084	2.22135	1.91355	1.85946	2.15975	1.45145	2.37541	1.83897	1.48236	2.0239	2.20841	2.42078	2.72684	2.72462	1.80334	2.18698	2.17111	2.66194	3.64136	3.69152	3.38879	2.94289	2.86642	4.03256	2.52298	2.65587	2.90255	1.9994	1.7404	3.3857	3.01385
LPL	4.67166	4.43491	3.72378	2.24619	4.79298	2.20865	2.37417	6.34061	5.85645	3.51792	5.8452	5.00065	3.69612	6.98816	6.93704	5.85816	4.41769	4.10117	6.04767	7.39381	3.20073	6.53068	3.67732	5.14381	5.39905	2.64002	3.07652	3.37567	2.11104	3.82865	3.4266	5.7141	3.78449	5.7799	3.98389	4.06811	7.18822	4.45987	4.70256	4.58347	3.51171	3.18463	4.75943	4.58842	6.91168	4.73551	2.41575	5.52939	2.93615
AKR1C1	0.24403	0.13053	0.48604	0.231378	0.163942	0.845794	0.598164	0.654648	0.993915	1.21516	0.183741	0.979027	0.546056	1.13606	0.0284269	0.388217	0.1635	0.0934958	0.0823396	0.24267	0.493642	0.196437	0.956037	0.510789	0.517269	0.707499	1.04256	0.789161	0.740094	0.182378	0.336066	0.246018	0.177248	0.0740523	0.0940377	0.024169	0.573357	1.5243	0.641907	0.645857	0.581801	0.501889	0.693311	0.263938	0.133786	0.968373	1.40694	0.0376487	0.355875
GAL3ST1	1.77537	1.06887	1.5106	0.427386	1.80297	1.27619	2.11209	2.21037	3.49772	1.29097	1.02282	3.34181	3.93225	2.28453	0.542432	3.96758	0.0741023	1.45378	0.372748	2.05718	0.558638	0.97793	1.02063	1.05659	2.62684	0.985004	2.27675	0.580278	1.64691	1.61092	1.25248	1.83062	5.60577	0.886127	1.11944	1.01768	2.20425	1.01735	3.20231	2.10395	0.298991	1.64306	4.31897	2.42178	0.361228	2.00227	0.986563	0.811319	3.44385
ALPL	1.819	2.62711	2.69159	2.00688	2.89381	3.2399	2.32915	3.06431	3.72352	3.23875	3.52341	3.38566	2.79663	3.49364	1.79897	3.59137	2.20725	3.36175	2.67546	1.51835	3.53017	2.77177	1.97125	3.3656	2.30187	2.08148	3.15638	1.77767	3.16583	3.07604	3.55417	3.28659	2.78979	2.20196	4.02635	3.16042	2.86903	2.80872	2.41407	4.25341	2.08433	2.88577	3.90553	4.26088	1.81065	3.15897	2.95435	3.03068	4.37838
ACOX2	1.24921	2.92359	1.2903	2.09888	2.11965	0.98021	2.19571	1.70972	0.784444	2.96609	1.65979	2.00083	0.68766	1.73574	2.79986	0.980393	1.71523	2.86861	1.16154	2.99268	2.54913	0.966139	2.32577	1.28684	2.6151	1.85556	1.01272	2.78617	1.91226	1.41685	2.32494	1.16876	0.481728	1.49825	1.35295	2.51135	1.1986	2.64412	2.00437	2.79518	0.623036	1.95439	1.25601	2.37914	2.91648	1.21136	1.01959	1.84296	1.3992
CHST7	3.36458	2.58247	3.28185	4.37993	3.55087	2.10021	2.59244	4.64089	2.39125	2.41101	4.09364	3.50408	2.58429	2.91834	3.80848	2.47526	5.59454	3.49264	4.31971	2.85446	1.53082	3.11572	1.65345	3.73368	1.92788	3.91841	2.86571	1.74312	2.17922	3.15372	2.98339	2.59046	2.14838	2.72429	3.48463	3.32021	2.80409	2.02865	2.99704	3.28051	2.64334	2.8574	3.14409	1.92559	1.99033	2.76445	2.07957	3.46052	3.0787
CYP4F3	1.67764	0.514261	0.201151	0.354314	1.45473	0.138374	1.70745	0.261319	0.0296967	2.41298	0.133359	0.470476	0.0761785	0.060641	0.0179211	0.156957	0.0449647	1.49669	0.328268	0.0379383	2.32427	0.0993846	2.13455	0.432964	3.77976	0.0729064	0.47761	0.884553	3.64923	0.121096	2.4508	0.349355	0.0720189	0.046116	0.425487	0.894231	0.282017	1.04091	0.784069	1.35341	2.9364	1.3421	0.634368	1.77675	0.709849	0.453941	0.272303	0.0972754	1.95511
BDH2	3.83407	4.57747	3.44999	4.42982	3.57505	2.71689	4.99902	3.65822	3.37073	3.88416	3.48905	3.33401	1.99493	3.42635	3.62336	2.84031	3.79279	4.34332	3.04172	3.84355	3.73007	2.92511	3.61819	3.13748	4.34551	5.25225	3.50532	3.02697	4.10182	3.93657	4.30904	2.62818	2.95289	3.14906	3.5578	4.33556	3.70241	4.26054	4.04753	4.4101	3.01722	3.50953	3.22969	4.30268	3.71822	4.05323	2.82835	3.27187	3.46863
PLCB2	2.80466	1.42688	2.52131	2.1098	2.02591	1.64076	2.72866	2.27773	1.73539	3.70126	2.77853	2.75451	1.86347	2.31394	2.83567	2.34938	1.56458	2.17568	2.39388	3.29205	3.41141	2.09723	3.58672	1.25421	2.83671	3.17418	1.90333	3.17757	2.51509	3.54333	1.15366	2.6276	1.83634	3.25837	3.01084	2.22053	2.49922	3.20404	1.47676	3.60086	3.79057	1.26172	3.27778	2.16704	1.89995	1.572	1.76618	2.91272	1.82935
MVD	2.97525	3.27001	3.12913	3.58815	3.06997	3.15831	3.31221	4.60545	3.35341	2.81665	3.15035	3.05126	3.32854	3.11876	3.58237	3.11442	3.28842	3.26743	3.11627	2.37293	1.92663	2.60864	2.28094	3.40807	2.66023	2.96552	3.31831	2.55854	3.67862	2.97804	4.32179	2.9201	3.95642	3.58205	3.72299	4.4047	3.38637	3.46935	4.11748	2.73634	3.20008	3.71964	3.60964	3.33789	2.98581	3.05326	3.23446	3.12984	4.0391
LYPLA2	4.49946	3.00503	3.67105	3.2858	3.80584	4.26128	3.62069	4.31965	4.53168	4.01812	4.29492	3.44652	4.65842	3.75651	4.55588	3.94265	4.7614	3.51625	4.28566	4.00026	3.58536	3.82351	2.97778	3.75978	3.27411	4.03483	3.47224	4.326	4.76486	4.57827	3.25942	4.28891	4.46038	3.97149	4.0937	4.51192	4.31505	4.52652	3.69785	3.88364	4.42501	3.78411	4.40226	3.67159	4.82199	3.60959	3.86308	4.29765	4.14884
NOS2	2.48761	0.614911	0.195417	0.688341	4.70919	0.875546	0.70244	4.18743	0.669916	0.433827	1.22624	1.00931	0.289151	1.06738	0.828033	0.800656	0.82721	0.51453	5.42491	1.3734	0.5284	0.642963	0.351462	2.34354	0.823883	0.162239	2.34485	0.430586	0.854048	0.738478	1.0748	1.63804	0.170821	0.923268	1.18807	1.37455	4.26946	0.747276	0.620958	0.622769	2.45503	0.848415	0.912642	0.307085	3.67363	1.30967	2.03153	6.0155	1.30789
ATP6V1B1	0.560449	0.450801	0.140316	0.075147	0.492815	0.0478025	0.173349	1.01028	1.37329	0.982665	1.61626	0.165641	0.943508	0.400566	0.789835	1.00657	1.80008	0.94136	0.801716	0.888093	0.301102	0.532388	0.0762531	0.318153	1.0079	0.228648	0.131837	0.484234	0.690113	0.863972	0.933949	1.3512	1.40021	2.0048	0.793634	2.14778	2.08539	1.29908	0.419032	0.969529	0.683882	0.0651322	1.23873	0.386406	1.88232	0.0976229	0.0951915	1.39033	1.71704
AMT	2.5916	2.67836	2.53137	2.30435	1.40213	1.59003	2.70931	2.50994	1.65429	1.90113	2.29693	2.54371	1.22894	0.858811	2.32805	1.17087	3.00816	2.87791	1.5123	1.96714	1.99031	1.02927	3.11749	1.21038	2.66019	2.75002	1.83862	2.49916	1.81168	2.84005	2.93273	1.55093	2.80418	1.82229	2.05014	1.82302	2.03411	2.72889	2.49519	2.27139	1.81122	3.01299	2.32953	2.33511	2.6676	1.82169	1.73081	2.10678	2.26505
ACSM5	1.95879	1.59062	1.69083	0.9038	1.3302	0.913857	1.67524	1.33525	1.09097	1.04818	1.75056	1.72893	0.952627	2.48701	0.966211	1.88341	1.42145	1.20712	0.6801	1.41056	2.47573	1.48167	1.75958	1.10358	2.51138	1.55436	1.34334	1.21695	2.87144	2.07237	1.28825	1.43033	1.32985	1.64092	1.28238	3.12432	1.80357	1.45209	2.53707	2.35474	1.52722	1.13254	2.39261	2.43361	0.775422	0.959882	0.664745	1.14608	0.937871
NME4	4.32737	4.16564	4.29527	3.77783	4.2814	2.99369	4.51172	5.05816	4.73848	5.49465	5.01594	4.12295	5.01514	4.94247	5.17514	4.15426	4.84756	4.88952	4.65116	4.61248	4.21879	4.63003	4.03467	4.0542	4.13768	4.28941	3.65913	3.89848	4.87961	4.6041	4.21922	4.31123	4.17288	4.75957	4.46299	5.01684	4.8027	5.19486	4.58477	4.01672	4.24636	4.61033	4.5256	4.40538	5.26797	4.04725	3.21883	4.59616	4.81241
TBXAS1	2.7012	1.84359	2.41455	1.99762	2.47532	0.860163	2.31167	1.8378	2.00269	2.3786	2.61526	2.6313	2.86576	2.7396	2.95658	2.71266	1.88937	1.98465	2.32392	3.19216	3.23793	2.12061	3.23642	1.29945	3.03313	3.0219	1.62796	2.79193	2.29153	3.33421	1.16826	2.26548	1.52117	2.55085	2.17003	1.84423	2.95043	2.99788	2.53498	3.13022	3.25305	1.82595	3.34913	3.27237	1.47481	1.82866	1.23326	3.06281	1.76322
GPT2	4.82238	5.87984	5.37117	5.82765	4.58126	4.49773	5.38008	4.22881	5.20447	4.98247	5.114	4.36253	3.9915	5.06245	4.08357	4.59537	5.23346	5.33751	4.51053	4.50654	3.76876	4.83113	3.8721	4.36096	4.43457	5.79477	4.09343	4.61799	4.30799	4.57259	5.76065	3.99253	4.86084	4.78526	4.67935	4.63107	5.51912	5.28119	4.61716	3.8663	3.45554	4.9189	4.4313	4.51353	4.8036	4.38872	4.0925	4.49486	4.65162
ACSL6	2.50993	2.98053	2.86164	3.47921	2.46542	3.46019	3.53022	1.96891	1.83552	3.08496	2.18793	2.7793	1.6551	2.03559	1.36659	1.79326	1.74275	2.36841	1.07782	1.58936	2.92468	1.96947	1.38796	2.74185	2.34794	2.73654	3.3123	1.30684	2.09388	3.16554	3.03051	0.922565	1.36984	1.67726	1.66433	2.46256	0.923295	2.1435	2.25216	2.40497	3.12368	2.88215	1.3971	2.32616	1.21943	3.10203	3.66246	0.876185	1.73705
NDUFS5	7.5683	6.69125	7.28016	7.58651	6.9535	7.6269	7.46284	8.02362	7.4932	7.73309	8.03977	7.36868	7.67828	7.38921	7.84961	7.45172	7.72415	7.31808	7.33947	7.25224	7.09117	6.75686	7.79735	7.81502	7.19637	7.47729	7.74265	7.79658	8.13703	7.57827	7.79965	7.77207	7.33942	7.28888	6.93408	8.18525	7.83065	7.85739	7.87604	7.90261	7.89471	7.92311	6.88206	7.46101	8.30322	7.87602	8.06699	7.39054	7.54461
HSD17B3	0.592626	0.0354984	0.328675	0.579621	0.655776	0.252506	1.00751	0.858848	0.602811	1.45132	0.471382	1.37097	0.323234	0.37656	0.597423	0.443968	0.215526	0.593556	0.603255	0.640837	0.5888	0.721872	0.648994	0.226263	1.48295	0.417664	0.750805	1.65509	1.55848	1.07592	0.647957	0.679337	0.682979	0.598677	1.13533	0.725337	2.65245	3.26588	1.80433	1.42833	0.565795	0.921325	1.62933	1.14044	1.54032	0.484386	0.31038	1.10766	1.25377
A4GALT	1.94076	1.40462	1.17417	1.4303	1.52995	0.804953	1.93493	2.22525	1.44559	1.73249	1.66733	1.91706	1.6678	1.16314	1.53679	0.924664	2.80218	2.12256	1.06908	0.534623	2.16025	1.10024	1.35935	1.38478	2.016	0.94073	1.03585	0.964751	1.49848	2.21425	1.7977	1.72581	1.1089	1.47622	1.40906	2.22207	1.0362	1.96791	1.15711	2.19194	2.11226	1.13837	2.03711	2.38804	1.766	1.23042	1.34639	1.18677	1.65895
PAICS	4.57294	6.03008	4.42214	5.59018	4.75757	3.17367	4.81861	4.78377	4.31619	5.04506	5.00103	4.32499	3.9908	4.10694	5.1343	4.07793	5.0941	5.0457	5.13606	4.53509	4.64304	4.83288	4.20597	4.44988	4.51656	5.23492	3.95861	4.22309	4.11179	4.29755	4.75204	4.31412	3.50347	4.87038	4.98353	6.16713	4.56442	4.6109	4.78726	4.0201	4.0451	4.45483	3.798	4.69284	4.95193	4.48792	3.32207	4.88672	4.35739
LPCAT1	4.14512	3.17452	4.66925	4.62794	4.06975	3.45223	5.24969	3.82252	5.3149	5.16658	4.85536	3.92819	5.8832	3.26046	5.30995	4.62422	5.94451	4.38973	4.50317	5.0051	4.18151	4.44381	4.17424	4.29629	4.67623	5.22103	3.71149	4.85925	5.3281	4.04569	3.68818	5.04424	3.19779	5.21654	4.50413	4.84309	3.77017	4.28067	3.64795	3.12099	4.93499	3.20945	5.79064	3.07469	4.8008	3.45578	3.35771	4.48486	3.86163
ITPK1	4.98859	4.96571	4.88298	6.09766	5.11393	5.67049	5.06172	6.03245	4.29416	4.04347	4.70822	5.33202	4.88923	4.97536	4.43695	5.25195	4.93669	4.72923	4.71384	4.2863	4.16737	4.53621	3.88947	5.6018	4.05417	4.47245	5.53132	3.16037	4.98462	4.41321	5.92622	4.11044	5.13182	4.69679	5.01628	4.65224	4.76857	4.53941	5.64651	4.98157	3.99856	5.75159	5.68613	5.58327	4.22715	5.61091	5.31703	4.26787	5.5984
ATP6V0E2	5.99985	6.5862	5.94259	6.56296	6.66953	7.07342	6.97097	6.86497	6.50791	6.01262	6.08338	5.97209	7.48078	6.82752	6.38889	6.56615	6.07107	6.37343	6.53308	6.50557	6.08288	5.54353	5.36214	6.92322	6.24626	6.8418	6.13353	5.66942	7.47638	5.41474	6.59753	6.08599	6.23794	6.42172	6.4528	6.35806	5.76104	5.79473	6.76959	6.18848	6.22596	6.10237	6.04453	6.28595	6.69356	6.49529	6.63626	6.50178	6.69832
IMPA1	3.30768	3.7248	3.60593	3.24362	4.57892	3.70349	4.29539	2.80676	2.37898	3.38784	2.45209	3.08178	2.7597	3.0763	3.0423	2.8491	2.3013	2.85711	2.89913	2.59472	4.19874	3.85049	3.71133	3.33226	3.39898	3.87253	3.64163	3.58813	4.41581	3.55362	4.17656	2.96009	2.66033	3.30373	3.23984	4.68184	3.30146	4.15501	4.25619	4.48107	3.37881	4.79479	2.91839	4.22623	3.40162	3.80887	3.14772	3.53286	3.44823
NT5E	4.44024	3.83931	3.38822	6.10732	4.10446	2.13725	3.74673	3.60391	4.07691	3.49233	4.10616	3.87641	4.95897	3.91974	5.67975	4.49467	2.66732	2.94947	4.57214	5.05885	2.6163	3.65165	3.4118	5.3907	3.14852	5.19662	3.84513	1.61553	3.06232	2.89588	4.17361	3.00997	3.18261	4.31911	5.1386	2.6316	3.54444	1.60287	4.38896	4.0842	4.34425	1.49498	3.0778	2.31695	2.77469	4.53929	2.22645	2.19973	4.9387
DCT	0.816842	0.743704	0.3478	0.248604	0.140512	0.298508	0.604922	0.239744	0.236007	0.244168	0.144479	0.211202	1.30191	1.45333	0.12345	0.629377	0.121463	0.143457	0.29859	1.06322	2.42975	0.982385	0.29259	0.192453	0.438912	0.801684	0.334936	2.38768	0.65961	1.37847	0.516102	0.335472	0.205516	0.647424	0.245467	1.87172	0.179539	0.369563	0.487359	0.973321	1.3931	0.572673	0.226981	0.768259	0.165981	0.305648	0.475476	0.131556	1.15282
NDUFA4L2	3.05535	2.43103	2.13845	2.64753	3.58123	2.40601	2.50067	3.14728	2.86639	2.52528	4.17643	3.44206	4.34556	2.77842	3.95157	2.3753	3.9632	2.32178	4.22484	2.3412	1.95781	3.03391	1.91717	2.31201	2.19476	2.36122	2.62094	3.12055	3.0583	3.26769	2.70829	5.35017	2.97013	3.40219	3.1431	2.37264	3.23515	4.73674	2.24201	3.23026	4.2207	1.97055	3.28161	2.40258	3.51937	3.12289	2.86486	4.45467	3.53221
PSPH	4.05006	4.46774	3.92962	4.3802	3.80736	2.2763	4.34476	3.09491	3.56134	4.76406	7.62224	3.64193	3.50386	3.73043	3.98697	3.5347	4.5446	4.11288	3.27323	4.09519	4.05542	4.31811	4.25654	6.93384	4.03297	4.33308	4.49405	4.69078	4.87821	7.36509	4.34243	3.81997	2.68116	4.13505	4.10851	4.61133	6.76943	4.21317	3.8566	3.39219	5.62767	3.9535	3.40188	4.13099	3.3085	3.17567	2.32262	3.22073	3.42045
HK3	0.823989	0.228038	0.467564	0.4198	0.254401	0.352868	0.357728	0.41912	0.267523	1.27042	1.00743	0.417522	0.568409	0.187248	1.66581	1.21756	0.549112	0.457728	0.37561	1.20351	0.672109	0.848771	0.640854	0.384132	0.910866	0.859275	0.446903	1.16905	0.732495	2.65166	0.190129	2.17898	0.364225	1.68317	0.756329	0.526725	1.04504	3.43738	0.136756	2.20194	1.91361	0.265625	1.7776	0.852902	1.57085	0.254455	0.627617	2.73717	0.597862
PIK3CA	2.51516	2.75347	2.20782	2.13221	2.44803	1.80486	1.62869	1.74718	2.53475	2.12128	2.31164	1.94023	2.26083	2.62701	1.84969	2.36981	2.03432	1.99729	2.25812	2.29427	2.30542	2.7287	2.16188	2.1157	2.19937	2.44149	2.31924	2.43895	1.56583	1.75953	1.27273	2.58463	1.56801	2.15148	2.02585	2.40099	2.36711	3.34366	1.81798	2.03428	2.62973	1.79717	1.55817	1.69339	1.5944	2.3066	1.94129	2.36772	1.95929
ALDH3B1	2.0148	0.609393	1.33369	1.23844	2.03844	0.664863	1.30184	1.71262	1.11787	1.69798	1.64231	2.03191	1.55195	1.35155	2.9746	1.9472	1.07992	1.1785	1.46389	2.71777	2.10737	1.40524	2.33679	0.875173	1.65587	1.90788	0.833521	1.35402	1.35082	2.47256	0.715641	2.01786	4.41361	1.66323	1.22332	1.1833	2.20958	2.30435	1.52244	2.92152	2.02543	0.835538	2.40278	1.93128	1.41823	1.11944	0.614754	1.67551	1.36566
ST3GAL6	2.49907	1.14287	1.54927	0.793414	1.15342	1.38978	1.70436	1.87534	3.25913	1.79731	3.06741	1.72326	1.77365	2.63944	1.40061	2.12806	1.46669	1.62472	2.45835	2.25806	2.0631	2.6478	2.50699	1.72829	2.96945	1.4432	1.85671	2.20365	1.94485	2.08447	1.40749	3.13335	1.79237	2.06644	2.0507	2.5185	2.70856	1.97732	1.625	2.60321	1.93483	1.52689	2.05039	1.99016	2.45111	1.38122	1.63627	1.90043	2.66184
MGST1	2.90188	2.49035	3.4836	1.24656	4.13512	3.08722	4.07462	2.16899	1.73737	4.46096	2.19351	2.87281	2.42645	2.29807	3.71577	2.01009	1.9347	3.22736	1.0703	4.55494	3.66276	2.38724	4.65838	2.59324	4.86367	1.9616	2.42532	4.31703	3.98594	4.12057	3.44383	3.40289	1.93134	1.81032	2.8976	2.97088	2.77185	4.3403	4.31622	4.43967	3.24685	3.41404	3.55146	4.28271	2.29826	2.17498	2.24254	1.12943	3.29226
HMGCR	3.15713	3.87387	4.14798	3.3329	3.31472	4.30188	3.10814	4.25218	4.18878	3.29735	3.50558	3.4067	4.26706	3.92862	4.14856	4.27503	3.73569	3.76745	3.84923	3.82004	3.07351	3.71149	3.37729	4.1523	3.86411	3.62405	4.71161	3.41428	3.82681	2.62176	3.47552	3.23865	3.72546	4.04501	4.19538	4.28007	2.78886	2.54529	3.31795	2.14996	3.76238	2.97301	2.83319	3.08419	2.25729	4.18655	4.67599	2.99141	4.04997
B4GALT1	2.75101	1.97309	2.57928	2.32025	2.61238	1.17525	2.534	1.77036	1.71438	3.06267	2.4936	2.88389	2.56998	2.74639	3.04098	2.43046	3.25947	2.31327	2.29157	3.40301	3.49221	2.19653	3.94484	2.16302	2.82975	2.89801	2.17995	3.35156	2.7495	2.80758	1.87717	3.38928	1.50078	2.37697	2.40107	1.85377	2.48098	3.12648	1.86695	3.77385	3.10168	1.98309	3.40361	3.10798	1.94458	2.67815	2.12983	2.61801	2.31334
NPL	3.49775	4.0129	2.77561	4.11467	2.86458	1.80174	3.95479	1.69776	1.63256	2.92097	2.99484	3.29123	2.37239	2.4801	1.94057	3.29472	2.27684	2.34965	2.07355	2.52086	3.53058	2.71535	3.31703	1.895	2.58726	3.57031	2.11496	2.93972	4.19884	4.50462	4.53565	3.49654	2.70415	3.60699	2.20595	4.91856	2.96524	3.89602	4.88617	4.4029	2.78165	4.56223	4.09624	3.78936	2.59838	1.83709	1.32262	3.11833	2.11528
ADCY8	3.22827	4.81847	3.38366	3.53475	3.78907	2.76162	3.36031	3.21146	2.69868	4.17388	2.31048	3.57988	0.550094	4.277	1.56254	1.72091	4.1211	4.43956	2.57323	1.14695	3.11583	3.56601	1.33294	2.97355	2.31495	0.912614	2.43536	2.15356	3.88253	1.77711	4.02447	1.56245	1.31729	3.68808	0.851133	2.54043	2.31084	3.6838	2.68053	3.09346	2.72394	1.79953	2.15705	3.6572	1.5603	2.30949	2.33662	3.56167	2.21153
BCKDHB	3.98468	4.48921	3.68796	3.67814	3.63592	2.88105	4.03837	2.75828	2.71798	3.63766	3.21173	3.69503	2.31536	2.53909	3.14715	2.74315	3.46701	3.76264	3.12732	3.6329	3.68481	3.62301	3.22277	3.35264	3.65999	3.85507	3.03894	4.47257	3.72294	3.4591	3.12613	2.90616	2.70865	3.51628	3.52894	4.1389	3.08431	3.02605	3.52352	3.32383	3.16683	3.47516	2.87365	3.85334	3.50806	3.31302	2.69226	3.66342	3.41925
EPHX1	5.74547	4.55109	5.15131	4.77929	5.17233	5.79042	5.93691	6.08409	4.83002	5.27062	5.1116	5.38674	4.67951	5.38518	4.98244	5.02803	6.29061	5.33892	4.51651	5.20024	5.32728	4.46127	5.81366	5.1466	6.03556	6.08246	5.25353	5.49218	6.09223	5.02011	5.75221	4.68465	6.1686	4.46091	4.70647	5.50028	5.57331	4.83117	5.82824	6.08651	5.91645	6.24222	6.14989	5.87332	4.41797	5.24149	5.25117	4.47465	5.74184
LDHD	2.83588	3.12105	2.9805	4.17932	2.55874	3.70496	3.8122	3.80761	2.37247	1.14858	2.57928	3.11954	1.65254	2.66872	1.96808	2.61803	2.95456	2.43739	1.5567	2.031	2.10568	2.64743	2.47801	2.57625	3.03372	2.95168	3.26154	1.42216	1.3808	3.21996	3.64681	1.97302	3.03395	2.07674	1.42426	3.2223	1.72137	3.16824	3.96067	4.07982	1.41486	4.6211	3.0438	2.81723	1.43079	2.99183	3.2459	2.04801	2.67149
CYP27B1	5.07222	0.19399	0.216844	0.396315	0.291967	0.0872678	0.177963	0.0670453	0.36	0.65666	0.63365	0.180577	0.230433	0.101824	0.252941	1.05778	0.272634	0.333546	0.588997	0.347488	0.171978	1.98164	0.134446	0.199123	0.304042	0.401721	0.137297	0.520299	0.618963	2.49769	0.416588	0.578759	0.193927	0.992644	0.67237	7.28216	1.02196	2.2257	0.431547	0.197114	1.66137	0.389968	0.39516	0.18819	1.03361	0.136173	0.156746	0.60459	0.549718
DHRS3	5.09453	4.51602	3.39569	2.70856	5.37744	3.59043	4.37175	4.26528	3.22569	4.2013	3.73333	4.47731	3.39678	4.10817	4.14804	4.13699	3.67929	4.56641	3.69415	3.85221	5.38761	3.4618	5.2383	3.55184	5.04284	3.83675	3.03404	4.55021	3.90763	4.75164	3.76952	4.14653	3.1908	3.96098	4.61669	5.02247	5.63857	5.70827	4.19185	6.12945	4.82603	5.09278	4.93001	5.12084	5.20664	3.49214	3.63923	4.80719	4.45266
MAN1A1	2.28632	1.75121	3.01893	1.48361	3.03421	2.45734	1.62535	1.73938	1.71047	2.45575	2.17376	1.8145	1.81082	2.05905	2.70272	1.89664	2.16114	1.88319	1.27627	2.38043	2.75759	2.19297	3.76869	3.5329	2.43111	1.90191	3.51886	3.11976	1.34967	2.51593	2.12655	2.78278	0.724278	2.54861	1.41389	1.13691	1.92735	2.29335	2.03604	3.09955	2.5184	1.48605	2.77656	2.2276	0.606697	2.33099	3.62359	1.61048	1.2427
CA12	2.25334	3.70786	1.661	2.9787	2.90862	0.783315	3.54109	3.39981	0.879325	1.67147	1.83224	3.33816	0.759896	0.674047	5.199	1.49397	4.59968	1.98448	1.8138	5.04244	1.41437	2.93599	1.00146	2.12682	2.84068	2.81238	1.68506	1.56581	1.15224	0.49257	3.11285	3.76583	0.420495	2.87108	3.75853	2.37393	0.965366	3.41191	1.16961	1.76017	2.21961	1.22668	0.885144	2.03105	3.1616	2.47754	0.394981	3.75446	1.81192
LSS	3.47728	3.21544	3.98486	3.90811	4.07154	3.22534	3.33323	4.25543	2.77591	3.71949	3.38594	5.07787	4.01041	3.74127	3.49435	3.84584	4.23228	4.18537	4.27923	3.91767	3.26648	3.40346	3.14017	4.20495	4.01116	3.61657	3.72981	3.17732	3.95451	3.85915	4.39569	3.48398	5.00914	3.88357	4.02494	3.98816	5.09454	4.09354	4.75663	3.57662	3.81736	4.19353	4.34924	3.87308	3.75547	4.08743	3.49683	3.94186	4.88835
ALOX15B	0.465117	0.0321749	0.512401	0.303615	0.544675	0.373141	1.5626	0.0172224	0.528808	0.545355	0.453636	0.994965	2.0139	0.717091	1.683	2.302	1.03274	0.0977702	0.20997	0.503064	0.386804	1.67141	2.80241	0.13866	2.28113	1.34548	0.180343	0.15008	2.57531	2.32363	0.306307	1.39693	0.413433	0.697438	0.0228043	0.916215	3.76842	3.72684	3.38235	4.90934	2.80025	0.725231	2.1839	3.16468	1.48393	1.11806	0.756987	0.470593	1.48423
SRM	5.60717	4.88463	4.64552	5.23205	5.13247	4.79916	4.72056	5.60091	5.62619	5.58114	5.54656	4.7083	6.20503	5.45866	5.73102	5.41929	4.97516	4.88583	5.58906	5.0484	4.53962	5.1451	4.52682	5.05429	4.90753	4.30028	4.44328	5.22923	5.59557	5.15176	4.81345	5.32195	4.85622	5.45101	5.77413	5.76049	5.54981	5.16153	4.78958	4.64792	5.7608	4.74228	5.46537	4.86037	6.22511	4.48584	4.70551	5.60633	5.7726
ASH1L	3.97584	3.92111	3.74253	3.7236	3.31509	3.503	3.01927	2.99582	3.6925	3.50029	3.44593	3.39437	3.48212	3.8281	3.00093	3.50286	3.56963	3.6282	3.48852	3.49008	3.53326	3.98606	3.64388	3.71415	3.15574	3.68384	4.01504	4.13096	2.81651	2.8995	2.93628	3.19099	2.9249	3.51111	3.60719	3.44285	3.32524	2.64361	3.0386	2.80495	3.80354	3.18519	2.69871	2.82086	2.51189	3.55221	3.59316	3.04169	2.6865
ACADVL	4.90177	4.5994	4.70773	5.30742	5.07095	4.59581	5.7203	5.42726	4.88426	6.07618	4.97741	5.17841	4.38606	4.95183	5.13791	4.45861	5.59268	5.30634	5.24428	5.60868	4.84399	4.91303	5.48295	4.31186	5.71764	4.90447	4.7436	5.53624	5.80237	5.41082	5.52604	5.56431	5.71748	5.87059	5.43585	6.49775	6.1249	6.34759	5.85591	6.21322	6.24716	5.65058	5.24297	5.6645	5.77708	4.93067	4.61633	5.82332	5.987
HMOX1	5.25311	3.42101	3.19628	3.62461	4.64913	1.99564	3.52203	3.17332	3.37149	4.77363	4.42462	4.04234	4.44097	4.26748	3.9669	4.57008	3.55793	3.98701	3.1994	4.86122	4.71642	3.77148	4.91703	2.90028	4.37082	3.77958	2.52977	4.76644	3.41424	5.69805	2.75404	6.85354	3.37213	5.15467	3.99255	3.60101	4.56114	5.54425	3.07184	5.54414	5.04429	2.35999	5.18452	5.05569	7.28037	2.41446	2.40105	7.88881	3.43575
AGPAT2	2.37456	2.53954	2.34182	2.99439	2.80904	2.29196	2.79502	2.65509	1.20995	4.27451	2.91421	2.63806	2.17621	2.38264	3.30225	2.36941	4.22516	3.06701	3.24047	2.29511	2.35079	1.82532	3.08165	2.39382	3.1324	2.36576	2.04942	3.23098	2.30672	3.66681	3.26651	2.95872	1.6448	2.04984	2.69856	1.41146	4.04796	3.71737	2.86211	3.7773	2.93168	3.38169	2.84294	3.05539	3.62511	2.72147	2.87586	3.59128	3.07246
HSD17B8	3.13173	2.78145	2.73027	2.84358	3.3185	1.99157	3.22791	3.96303	1.91993	2.17006	2.5679	3.19883	2.35483	3.19166	3.28645	2.10191	3.30827	3.54012	2.52289	3.1226	3.48651	3.59967	3.92691	3.47399	2.69665	2.02344	2.35586	2.69878	3.14341	3.95209	3.42953	2.72478	2.3752	3.12896	2.61731	2.75559	3.37342	3.71635	3.18015	3.96935	2.81286	3.7687	3.05756	4.35157	2.61311	2.28474	2.43217	2.70083	2.84759
HMGCS1	4.11759	5.68032	4.81952	4.80972	4.45404	4.97993	4.20909	4.93203	4.45866	4.52977	4.14378	4.03071	4.17473	4.93387	5.00574	4.71422	5.43548	5.37113	4.86642	4.59623	4.44447	4.82467	3.91003	5.28251	5.0304	4.52589	5.91954	3.99185	4.4575	3.61865	5.35458	3.69853	5.63793	5.34467	5.63183	5.8042	3.48129	3.40744	4.61942	3.44894	4.51455	4.04471	4.73126	4.35568	3.3601	5.10619	5.5199	3.88035	5.44497
[truncated: 460 more columns]
